# Supplementary material for: Would primary healthcare professionals prescribe a polypill to manage cardiovascular risk? A qualitative interview study
Source: PubMed Central journal article supplement — BMJ Open. 2013 Mar 25;3(3):e002498. doi: 10.1136/bmjopen-2012-002498 (PMC3612792; doi:10.1136/bmjopen-2012-002498), 2013-03-25
Supplement: bmjopen-2012-002498.draft_revisions.pdf [file bmjopen-2012-002498.draft_revisions.pdf]

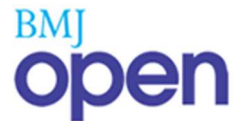

**Would primary health care professionals prescribe a polypill to manage cardiovascular risk? A qualitative interview study**

|                                 |                                                                                                                                                                                                                                                                                                                                                                                                                                                                                                    |
|---------------------------------|----------------------------------------------------------------------------------------------------------------------------------------------------------------------------------------------------------------------------------------------------------------------------------------------------------------------------------------------------------------------------------------------------------------------------------------------------------------------------------------------------|
| Journal:                        | <i>BMJ Open</i>                                                                                                                                                                                                                                                                                                                                                                                                                                                                                    |
| Manuscript ID:                  | bmjopen-2012-002498                                                                                                                                                                                                                                                                                                                                                                                                                                                                                |
| Article Type:                   | Research                                                                                                                                                                                                                                                                                                                                                                                                                                                                                           |
| Date Submitted by the Author:   | 14-Dec-2012                                                                                                                                                                                                                                                                                                                                                                                                                                                                                        |
| Complete List of Authors:       | Virdee, Satnam; University of Birmingham, Primary Care Clinical Sciences<br>Greenfield, Sheila; University of Birmingham, Primary Care Clinical Sciences<br>Fletcher, Kate; University of Birmingham, Primary Care Clinical Sciences<br>McManus, Richard; University of Oxford, University of Oxford, Dept of Primary Health Care<br>Hobbs, Richard; University of Oxford, Dept of Primary Health Care<br>Mant, Jonathan; University of Cambridge, General Practice and Primary Care Research Unit |
| <b>Primary Subject Heading</b>: | Cardiovascular medicine                                                                                                                                                                                                                                                                                                                                                                                                                                                                            |
| Secondary Subject Heading:      | General practice / Family practice, Qualitative research                                                                                                                                                                                                                                                                                                                                                                                                                                           |
| Keywords:                       | Coronary heart disease < CARDIOLOGY, PRIMARY CARE, QUALITATIVE RESEARCH                                                                                                                                                                                                                                                                                                                                                                                                                            |
|                                 |                                                                                                                                                                                                                                                                                                                                                                                                                                                                                                    |

SCHOLARONE™  
Manuscripts

only

1  
2  
3 **Would primary health care professionals prescribe a polypill to manage**  
4  
5  
6 **cardiovascular risk? A qualitative interview study**  
7  
8

9 Satnam K Virdee, Sheila M Greenfield, Kate Fletcher, Richard J McManus, FD Richard Hobbs,  
10 Jonathan Mant.  
11

12  
13  
14  
15 Primary Care Clinical Sciences, NIHR National School for Primary Care Research, Primary  
16 Care Clinical Sciences Building, University of Birmingham, Edgbaston, Birmingham, B15 2TT  
17

18 Satnam K Virdee  
19

20 Research associate  
21

22 Sheila M Greenfield  
23

24 Professor  
25

26 Kate Fletcher  
27

28 Programme manager  
29

30  
31 Primary Care Health Sciences, NIHR National School for Primary Care Research, University of  
32 Oxford, 23-38 Hythe Bridge Street, Oxford, OX1 2ET  
33

34 Richard J McManus  
35

36 Professor  
37

38 FD Richard Hobbs  
39

40 Professor  
41

42 Primary Care Unit, University of Cambridge, Strangeways Research Laboratory, Worts  
43 Causeway, Cambridge, CB1 8RN  
44

45 Jonathan Mant  
46

47 Professor  
48

49  
50  
51  
52  
53 Correspondence to: Professor Sheila M Greenfield  
54 [s.m.greenfield@bham.ac.uk](mailto:s.m.greenfield@bham.ac.uk)  
55  
56  
57  
58  
59  
60

## Abstract

### Objectives

A 'polypill' containing both blood pressure and cholesterol lowering drugs could prevent up to 80% of cardiovascular disease events. Since little is known about the attitudes of primary health care professionals to use of such a pill for cardiovascular disease prevention, this study aimed to investigate opinions.

### Design

Semi-structured interviews were conducted with participants. A qualitative description approach was used to analyse and report the results.

### Setting

Participants were recruited from nine primary care practices in Birmingham.

### Participants

Sixteen health care professionals (11 primary care physicians and 5 practice nurses) were selected through purposive sampling to maximise variation of characteristics.

### Outcome measures

Outcome measures for this study were: the attitude of health care professionals towards the use of a polypill for primary and secondary cardiovascular disease prevention; their views on monitoring the drug; and the factors influencing their willingness to prescribe the medication.

### Results

1  
2  
3 Health care professionals expressed considerable concern over using a polypill for primary  
4  
5 prevention for all people over a specific age, although there was greater acceptance of its  
6  
7 use for secondary prevention. Regularly monitoring patients taking the polypill was deemed  
8  
9 essential. Evidence of effectiveness, patient risk level and potential medicalisation were key  
10  
11 determinants in willingness to prescribe such a pill.  
12  
13

### 14 15 **Conclusions**

16  
17  
18 Primary health care professionals have significant concerns about the use of a polypill,  
19  
20 particularly in the prevention of cardiovascular disease in people who are not regarded as  
21  
22 being at 'high risk'. If a population based polypill strategy is to be successfully implemented,  
23  
24 health care professionals will need to be convinced of the potential benefits of a drug based  
25  
26 population approach to prevention.  
27  
28  
29  
30  
31  
32  
33  
34  
35  
36  
37  
38  
39  
40  
41  
42  
43  
44  
45  
46  
47  
48  
49  
50  
51  
52  
53  
54  
55  
56  
57  
58  
59  
60

## Article summary

### Article focus

- A 'polypill' containing several blood pressure and cholesterol lowering drugs has large theoretical benefits in terms of reducing cardiovascular morbidity. Short term trials have demonstrated its efficacy.
- Although small scale surveys of physicians suggest that the use of the polypill may be acceptable to health care professionals, they have not provided detailed data on attitudes to the polypill.
- The aim of this study was to investigate the attitude of health care professionals to the use of a polypill for cardiovascular disease prevention.

### Key messages

- There was considerable resistance towards the use of a polypill for the prevention of cardiovascular disease in people not regarded as being at 'high risk'.
- Evidence of efficacy was judged important but potential medicalisation and an ongoing need for monitoring were significant issues for many health care professionals.
- If a population based polypill strategy is to be introduced, significant barriers from professionals will need to be overcome.

### Strengths and limitations of this study

- The study's qualitative approach allowed a detailed exploration of attitudes not possible in quantitative surveys.

1  
2  
3  
4  
5  
6  
7  
8  
9  
10  
11  
12  
13  
14  
15  
16  
17  
18  
19  
20  
21  
22  
23  
24  
25  
26  
27  
28  
29  
30  
31  
32  
33  
34  
35  
36  
37  
38  
39  
40  
41  
42  
43  
44  
45  
46  
47  
48  
49  
50  
51  
52  
53  
54  
55  
56  
57  
58  
59  
60

- Conversely, we cannot comment on how prevalent the views expressed in this study are in the wider population of health care professionals.

For peer review only

1  
2  
3 **Funding:** This work was supported by the National Institute for Health Research Applied  
4  
5 Research funding scheme, grant number RP-PG-0606-1153. The views and opinions  
6  
7 expressed within the study do not necessarily reflect those of the Department of  
8  
9 Health/National Institute for Health Research.  
10  
11

12  
13 **Competing interests:** None declared.  
14

15  
16 **Contributors:** The study was designed by SKV, SMG, KF and JM. SKV conducted the  
17  
18 interviews, analysed the data and drafted the paper. SKV, SMG and JM contributed to  
19  
20 subsequent drafts. All authors critically revised the paper.  
21  
22

23  
24 **Data sharing statement:** No additional data available.  
25  
26  
27  
28  
29  
30  
31  
32  
33  
34  
35  
36  
37  
38  
39  
40  
41  
42  
43  
44  
45  
46  
47  
48  
49  
50  
51  
52  
53  
54  
55  
56  
57  
58  
59  
60

## Introduction

Cardiovascular disease remains the major cause of morbidity and mortality worldwide.<sup>1</sup>

There have been significant advances in the evidence base for cardiovascular disease prevention, particularly regarding pharmacological interventions aimed at lowering blood pressure<sup>2,3</sup> and cholesterol.<sup>4</sup> Guidelines recommend use of these agents for both secondary and primary prevention in people at raised cardiovascular risk.<sup>5,6</sup> However repeated surveys have shown many patients are not being treated as intensively as guidelines recommend.<sup>7,8</sup> Furthermore, the majority of cardiovascular events occur in people not at high risk using conventional risk calculators.<sup>9</sup> Therefore, offering a 'polypill' to everyone over a particular age (for example 55) has been proposed.<sup>10</sup> This involves a single daily combined pill containing both blood pressure and cholesterol lowering agents at a fixed low dose (to reduce adverse effects) with minimal monitoring required, as opposed to titrating individual treatments to specific targets. The polypill may also have a role in people with known cardiovascular risk factors, since it may lead to better patient adherence.<sup>11,12</sup> Wald and Law<sup>10</sup> estimate adopting a polypill strategy could prevent 80% of strokes and 88% of ischaemic heart disease events, with low risk of adverse effects.

If used in the UK, it is likely that the polypill would largely be prescribed and monitored within primary care. Implementation would require considerable professional engagement but to date there has been limited research on the polypill's professional acceptability.

Three small practitioner surveys have been conducted, but none in the UK. Holt<sup>13</sup> found from a survey of 17 New Zealand primary care physicians almost all were familiar with the polypill. They were keen on its simplicity and the likely increased compliance, but disliked the lack of flexibility of the components and doses. More recently, Soliman et al<sup>14</sup> surveyed



1  
2  
3 58 Sri Lankan physicians and discovered a high degree of acceptability of prescribing the  
4  
5 polypill for primary prevention and even higher for secondary prevention. Viera et al's<sup>15</sup>  
6  
7 findings from a survey of 952 US physicians also revealed relatively high acceptance, but low  
8  
9 agreement to minimal monitoring. Such surveys whilst useful in gauging high level opinion,  
10  
11 cannot explore detailed issues around acceptability in any depth.  
12  
13

14  
15 This paper reports on a study which used a qualitative description approach<sup>16,17</sup> to  
16  
17 investigate UK health care professionals' i.e. primary care physicians' and practice nurses'  
18  
19 attitude towards using the polypill for cardiovascular disease prevention and the drug's  
20  
21 practicality for monitoring and prescribing.  
22  
23  
24  
25  
26  
27  
28  
29  
30  
31  
32  
33  
34  
35  
36  
37  
38  
39  
40  
41  
42  
43  
44  
45  
46  
47  
48  
49  
50  
51  
52  
53  
54  
55  
56  
57  
58  
59  
60

## Method

### Participants and sampling

11 Birmingham primary care practices agreed to participate of 20 initially approached. Practices were purposively selected to maximise variation in our sample.<sup>18</sup> They were chosen to represent different sizes (number of full-time equivalent primary care physicians) as practice size is known to affect prescribing behaviour.<sup>19</sup> Practices were also selected to reflect different levels of socio-economic deprivation (Indices of Multiple Deprivation (IMD) score of the practice area) since cardiovascular need tends to be higher in practices based in relatively deprived areas.<sup>20</sup> The IMD score is a single deprivation score combining a number of indicators covering a range of economic, social and housing issues.<sup>21</sup> Scores were divided into quartiles, one representing the least deprived areas and four the most. To contextualise this work, Birmingham consists of a population of about one million people including diverse ethnic groups with one-third from a non-white background.<sup>22</sup>

The 56 primary care physicians and 22 practice nurses in the 11 practices were sent a postal questionnaire enquiring about their gender, ethnicity (2001 general census ethnic categories)<sup>23</sup> and year of qualification, together with a 'Beliefs about Medicines Questionnaire (BMQ)-General'.<sup>24</sup> This includes two scales (General-Harm and General-Overuse) to measure respondents' attitudes to medicines in general. High scores indicate a greater belief that medicines are harmful and overused. This was used for sampling to ensure a range of views on general medication usage. Since we wanted respondents with extreme views and moderate beliefs and there appeared to be different ways to interpret scores,<sup>25-27</sup> we divided respondents' scores into tertiles, scores between 8-15 being categorised as low, 16-22 as medium and 23-34 as high.

1  
2  
3 58 (74%) health care professionals returned a completed BMQ-General. Respondents were  
4  
5 sampled on these scores as well as a maximum variety of individual (occupation, gender,  
6  
7 ethnicity, qualification year) and organisational (practice size, practice IMD score)  
8  
9 characteristics to allow a diversity of responses to emerge. 50 health care professionals (41  
10  
11 primary care physicians and 9 practice nurses) were selected and approached by letter, and  
12  
13 16 (11 primary care physicians and 5 practice nurses) agreed to interview across 9 practices.  
14  
15  
16

### 17 18 **Interviews**

19  
20  
21 Semi-structured interviews were used to elicit health care professionals views as they  
22  
23 provide an opportunity for in-depth investigation of personal perspectives, detailed  
24  
25 understanding and chance for clarification.<sup>28</sup> The interview guide was developed through a  
26  
27 discussion of the polypill and cardiovascular disease literature by research team members  
28  
29 (SKV, SMG, KF and JM) and covered: health care professionals' understanding of the polypill;  
30  
31 their attitude towards its use; and prescribing and monitoring the drug. Ethical approval to  
32  
33 conduct the interviews was granted by the Birmingham, East, North and Solihull Research  
34  
35 Ethics Committee (08/H1206/91). Signed informed consent was obtained before the  
36  
37 interview. All interviews were carried out at the practices by one of the authors (SKV) from  
38  
39 March to October 2009. Interviews lasted between 30-60 minutes, were audio recorded  
40  
41 and transcribed verbatim.  
42  
43  
44  
45  
46

### 47 48 **Analysis**

49  
50  
51 All transcripts were checked against the recording for accuracy. As part of the process of  
52  
53 respondent validation,<sup>29</sup> health care professionals were sent a copy of their transcript and a  
54  
55 brief summary of the interview for comments. Only one additional comment was made.  
56  
57  
58  
59  
60

1  
2  
3 Throughout the analytic process each transcript was compared with others to develop  
4  
5 conceptualisations of the possible relations between various pieces of data and key areas.<sup>30</sup>  
6  
7 Interviews continued until the authors (SKV, SMG and KF) agreed saturation had been  
8  
9 achieved. Transcripts and field notes were read independently by the authors (SKV, SMG  
10  
11 and KF) and the subthemes identified in each key area.<sup>16</sup> These were discussed by the  
12  
13 multidisciplinary team of clinicians and non-clinicians and a thematic coding framework was  
14  
15 developed to code each transcript systematically. Framework software was used to aid data  
16  
17 organisation.<sup>31</sup>  
18  
19  
20  
21  
22  
23  
24  
25  
26  
27  
28  
29  
30  
31  
32  
33  
34  
35  
36  
37  
38  
39  
40  
41  
42  
43  
44  
45  
46  
47  
48  
49  
50  
51  
52  
53  
54  
55  
56  
57  
58  
59  
60

## Results

### Participants

There were similar numbers of men and women (table 1) but all practice nurses were female and most primary care physicians were male. Seven participants were from a minority ethnic group (3 Indian; 1 White Irish; 1 Chinese; and 2 other). Most gained their professional qualification between 1970 and 1989. Participants had a full range of attitudes towards medicines determined by their BMQ-General score, but the four respondents with more positive attitudes towards medicines were all practice nurses.

### Key areas

To facilitate comparison of comments and contextualise subthemes, these are presented within each of the three key areas: attitude towards the polypill; opinions on monitoring; and views on prescribing. The number of respondents discussing each subtheme is reported (denominator 16 participants).<sup>32</sup> Interview extracts representative of each subtheme are shown in tables 2-4. Comparison of the subthemes did not reveal any relationship between health care professionals' characteristics and their views on the polypill in managing cardiovascular risk.

### **Attitude towards the polypill (table 2)**

Health care professionals discussed their attitude towards the polypill in terms of what they already knew and understood about it, and their thoughts about using the medication for primary and secondary prevention.

### ***Knowledge and understanding of the polypill***

1  
2  
3 The majority of respondents (11) understood the polypill would be used for cardiovascular  
4 disease prevention, whether for primary or secondary prevention or indeed both, and that it  
5 would contain multiple ingredients. Beyond this, their knowledge appeared limited. Most  
6 (10) were uncertain about how they might use it, and what drugs at what doses would be in  
7 it. Some (3) mentioned their knowledge was based on what they had read in journals or  
8 seen in the media.  
9

### 10 11 12 13 14 15 16 17 18 ***Use of the polypill for primary prevention*** 19

20  
21 All interviewees (16) expressed concern about using the polypill for primary prevention for  
22 everyone over a specific age. Most concerns were regarding: potential side-effects;  
23 difficulty in identifying the ingredient(s) causing side-effects; and the built-in inability to  
24 titrate the ingredients and dose. Other concerns raised were: unnecessary medicalisation of  
25 healthy people; lack of evidence demonstrating effectiveness; and the potential negative  
26 impact on health related behaviour, possibly leading to complacency about leading a  
27 healthy lifestyle.  
28

29  
30  
31  
32  
33  
34  
35  
36  
37  
38 Despite apprehension, half of health care professionals (8) recognised the possible  
39 advantages of administering a polypill to everyone over a specific age: mainly the potential  
40 to reduce the risk of developing cardiovascular disease at a population level. Hence a  
41 number (5) were receptive towards a population approach, although the majority (10)  
42 thought the polypill should only be given to those with cardiovascular disease risk factors.  
43  
44  
45  
46  
47  
48  
49

### 50 51 ***Use of the polypill for secondary prevention*** 52

53  
54 Of those interviewees (8) who discussed using the polypill for secondary prevention, most  
55 (6) appeared positive believing it would be more practical for patients to take thereby  
56  
57  
58  
59  
60

1  
2  
3 improving compliance. However, a minority (2) questioned its value for secondary  
4  
5 prevention as it would merely be a combined replacement of current cardiovascular disease  
6  
7 medication.  
8  
9

### 10 **Monitoring patients taking the polypill (table 3)**

11  
12  
13  
14 Health care professionals reflected upon both regular and minimal monitoring of patients  
15  
16 taking the polypill.  
17  
18

#### 19 ***Regular monitoring of patients***

20  
21  
22  
23 Almost all participants (15) felt it was essential to regularly monitor patients taking the  
24  
25 polypill to: check the medication was both safe and effective, especially as it is a new drug;  
26  
27 screen for and encourage patient compliance; and because of the perception that most  
28  
29 prescribed medications require some degree of monitoring. Only one respondent felt  
30  
31 regular monitoring was unnecessary otherwise the polypill would become unfeasible,  
32  
33 although he highlighted the dose would need to be considered safe enough.  
34  
35  
36

#### 37 ***Minimal monitoring of patients***

38  
39  
40 The idea of minimal monitoring of patients taking the polypill caused major unease amongst  
41  
42 most health care professionals (11), with two claiming such a strategy to be negligent.  
43  
44 Several (7) claimed they would need to see evidence that minimal monitoring was deemed  
45  
46 appropriate before they could be convinced to adopt this practice. Others (4) argued they  
47  
48 would monitor patients regularly even if the advice was that it was unnecessary.  
49  
50  
51

### 52 **Prescribing the polypill (table 4)**

1  
2  
3 Although all health care professionals (16) would consider prescribing the polypill, there  
4  
5 appeared to be several factors influencing their willingness. These could be divided into  
6  
7 four groups relating to: their personal values; features of the drug; external issues; and  
8  
9 patient factors.  
10

### 11 12 13 Personal factors

14  
15  
16 For many respondents (10), personal beliefs regarding unnecessary medicalisation meant  
17  
18 they would not prescribe the polypill without an indication in addition to age alone.  
19

### 20 21 22 Drug factors

23  
24  
25 There were three important factors about the polypill that were deemed to have an  
26  
27 influence on whether or not health care professionals would prescribe it: cost; monitoring;  
28  
29 and titration. According to just under half (7) if the polypill was cost-effective for both  
30  
31 patients and the National Health Service, they would be more likely to prescribe. However,  
32  
33 others (5) stated cost would have no bearing on their decision if the outcome was  
34  
35 beneficial. Some respondents (6) claimed they would be more willing to prescribe the  
36  
37 polypill if they could monitor patients. Quite a few (6) had concerns over the inability to  
38  
39 titrate it which meant they were reluctant about prescribing.  
40  
41  
42  
43

### 44 45 External factors

46  
47  
48 Two external factors, evidence and guidance from the Department of Health (DoH), seemed  
49  
50 to impact on participants' decision to prescribe the polypill. Most (13) claimed the evidence  
51  
52 demonstrating the polypill to be safe, effective and beneficial would be a major determinant  
53  
54 in their judgement. Two said if the DoH endorsed its prescribing, they would then do so.  
55  
56  
57  
58  
59  
60



1  
2  
3 Patient factors  
4

5  
6 There were several patient factors (risk level, patient choice, previous side-effects, existing  
7 cardiovascular disease, compliance, other medical conditions/medications) and one socio-  
8 demographic factor (age) that influenced health care professionals views regarding  
9 potential prescription of the polypill.  
10

11  
12 Most (10) claimed they would be more willing to prescribe the medication as a preventative  
13 measure for people with risk factors. Many (9) also believed their willingness would be  
14 influenced by the patient's choice to take the medication. A number of participants (7)  
15 mentioned they would not offer the polypill to patients who had experienced previous side-  
16 effects from the individual ingredients. Several (6) believed they would prescribe the  
17 polypill for patients on treatment for existing cardiovascular disease as a replacement for  
18 practical reasons. Others (4) thought they would avoid medicating these patients with the  
19 polypill since they require titrated dosages. Where patients had problems complying with  
20 multiple medications, some respondents (4) said they would be more likely to prescribe the  
21 polypill. A few (4) also suggested they would be less keen to offer the polypill to patients  
22 with complex medical conditions or who were on certain medications due to possible  
23 contra-indications.  
24  
25  
26  
27  
28  
29  
30  
31  
32  
33  
34  
35  
36  
37  
38  
39  
40  
41  
42  
43  
44

45  
46 In terms of age, the majority of interviewees (10) did not believe in prescribing the polypill  
47 to everyone over 50 years for primary prevention unless there were risk factors. However,  
48 several (5) claimed they would be willing to offer the medication to this population  
49 regardless of their risk level, as long as the evidence demonstrated it to be safe and  
50 effective. In fact, one health care professional thought the age limit should be as low as 40  
51 years for men. Some (4) said they would be happy to prescribe the polypill for the elderly as  
52  
53  
54  
55  
56  
57  
58  
59  
60

1  
2  
3  
4  
5  
6  
7  
8  
9  
10  
11  
12  
13  
14  
15  
16  
17  
18  
19  
20  
21  
22  
23  
24  
25  
26  
27  
28  
29  
30  
31  
32  
33  
34  
35  
36  
37  
38  
39  
40  
41  
42  
43  
44  
45  
46  
47  
48  
49  
50  
51  
52  
53  
54  
55  
56  
57  
58  
59  
60

it would be more practical for them to take, whereas others (2) maintained they would avoid it for this group due to problems of polypharmacy.

For peer review only

## Discussion

### Summary of main findings

Health care professionals were sceptical about the role of a polypill. A major concern was they did not feel the evidence base for a polypill had been established. They were particularly reluctant to prescribe on the basis of age and felt ongoing monitoring of blood pressure and cholesterol would be required. The inability to titrate dose in the polypill was seen as a further disadvantage. There was greater willingness to consider its use for secondary prevention, but with the same provisos about wanting to continue monitoring and with concerns about inability to adjust dose.

### Comparison with existing literature

As with a previous survey study,<sup>14</sup> we found health care professionals were more accepting of a polypill for secondary prevention perhaps because for those with existing cardiovascular disease there is a greater perceived need for medication. However, we discovered a lower level of acceptance for primary prevention, with more concerns regarding the pill itself. This may reflect typically slower uptake of new drugs by primary care physicians in the UK compared to other countries,<sup>33</sup> with many describing themselves as 'cautious' or 'conservative' in their prescribing behaviour.<sup>34</sup>

In our study, health care professionals disliked the concept of minimal monitoring of patients taking the polypill, a finding consistent with earlier studies.<sup>14,15</sup> This reflects current practice where patients are monitored for a number of reasons, including side-effects, effectiveness and compliance. Nevertheless, current National Institute for Health and

1  
2  
3 Clinical Excellence guidelines on lipid lowering therapy for primary prevention do not  
4  
5 recommend monitoring,<sup>6</sup> so attitudes may change.  
6  
7

### 8 **Strengths and limitations**

9  
10  
11 A study strength is that all interviews were carried out by a single researcher thereby  
12  
13 ensuring consistency.<sup>35</sup> The researcher was non-medical, and health care professionals'  
14  
15 responses may have been different if the researcher had been a clinician.  
16  
17

18  
19 The study's qualitative approach allowed an in-depth exploration of attitudes not possible in  
20  
21 quantitative surveys. Conversely, we are not able to comment on how prevalent the views  
22  
23 expressed in this study are in the wider population of primary health care professionals.  
24  
25

26  
27 Also, what respondents suggested they would do is not necessarily what they would actually  
28  
29 do in reality.  
30  
31

32  
33 Although the aim of qualitative research is not to be generalisable,<sup>36</sup> we did have a  
34  
35 representative sample of respondents across gender and ethnicity. Our sample size was  
36  
37 also sufficient to achieve saturation.<sup>37</sup>  
38  
39

### 40 **Implications**

41  
42  
43 This study suggests despite potential acceptance of use of a polypill for secondary  
44  
45 prevention, health care professionals remain concerned monitoring should continue. With  
46  
47 regard to primary prevention, there was considerable resistance to a population strategy  
48  
49 offering the polypill to everyone over a certain age. This reflected both a concern about the  
50  
51 lack of empirical evidence of the polypill's effectiveness and safety, and a concern regarding  
52  
53 medicalisation. If a polypill is to be used in this way, it is likely health care professionals  
54  
55  
56  
57  
58  
59  
60

1  
2  
3 would need to be convinced about the potential benefits of a drug based population  
4  
5 approach to prevention.  
6  
7

8  
9 **FUNDING:** Funded by National Institute for Health Research Applied Research funding scheme.  
10

11  
12 **COMPETING INTERESTS:** None  
13

14 **CONTRIBUTORSHIP:** The study was designed by SKV, SMG, KF and JM. SKV conducted the  
15  
16 interviews, analysed the data and drafted the paper. SKV, SMG and JM contributed to subsequent  
17  
18 drafts. All authors critically revised the paper.  
19

20  
21 **DATA SHARING:** No additional data available.  
22  
23  
24  
25  
26  
27  
28  
29  
30  
31  
32  
33  
34  
35  
36  
37  
38  
39  
40  
41  
42  
43  
44  
45  
46  
47  
48  
49  
50  
51  
52  
53  
54  
55  
56  
57  
58  
59  
60

1  
2  
3  
4  
5  
6  
7  
8  
9  
10  
11  
12  
13  
14  
15  
16  
17  
18  
19  
20  
21  
22  
23  
24  
25  
26  
27  
28  
29  
30  
31  
32  
33  
34  
35  
36  
37  
38  
39  
40  
41  
42  
43  
44  
45  
46  
47  
48  
49  
50  
51  
52  
53  
54  
55  
56  
57  
58  
59  
60

For peer review only

1  
2  
3  
4  
5  
6  
7  
8  
9  
10  
11  
12  
13  
14  
15  
16  
17  
18  
19  
20  
21  
22  
23  
24  
25  
26  
27  
28  
29  
30  
31  
32  
33  
34  
35  
36  
37  
38  
39  
40  
41  
42  
43  
44  
45  
46  
47  
48  
49

| Profession<br>(primary care physician (PCP) /practice nurse (PN)) | Practice number | Gender |        | Ethnicity     |       | Year of professional qualification |             |             |             |             | BMQ-General score |                |              | Practice size                                           |                                                          |                                                        | Indices of Multiple Deprivation (Quartiles) |   |   |   |
|-------------------------------------------------------------------|-----------------|--------|--------|---------------|-------|------------------------------------|-------------|-------------|-------------|-------------|-------------------|----------------|--------------|---------------------------------------------------------|----------------------------------------------------------|--------------------------------------------------------|---------------------------------------------|---|---|---|
|                                                                   |                 | Male   | Female | White British | Other | 1960 - 1969                        | 1970 - 1979 | 1980 - 1989 | 1990 - 1999 | 2000 - 2009 | Low (8-15)        | Medium (16-22) | High (23-34) | Small (1-2 full-time equivalent primary care physician) | Medium (3-4 full-time equivalent primary care physician) | Large (5≥ full-time equivalent primary care physician) | 1                                           | 2 | 3 | 4 |
| PCP 1                                                             | 1               | ✓      |        | ✓             |       |                                    | ✓           |             |             |             |                   | ✓              |              | ✓                                                       |                                                          |                                                        |                                             |   |   | ✓ |
| PCP 2                                                             | 2               |        | ✓      | ✓             |       |                                    |             | ✓           |             |             |                   | ✓              |              |                                                         | ✓                                                        |                                                        |                                             | ✓ |   |   |
| PCP 3                                                             | 2               | ✓      |        | ✓             |       |                                    |             | ✓           |             |             |                   | ✓              |              |                                                         | ✓                                                        |                                                        |                                             | ✓ |   |   |
| PCP 4                                                             | 4               | ✓      |        |               | ✓     |                                    | ✓           |             |             |             |                   | ✓              |              |                                                         | ✓                                                        |                                                        |                                             |   | ✓ |   |
| PCP 5                                                             | 5               | ✓      |        |               | ✓     |                                    |             |             |             | ✓           |                   |                | ✓            |                                                         |                                                          |                                                        |                                             |   | ✓ |   |
| PCP 6                                                             | 7               | ✓      |        |               | ✓     |                                    |             |             |             |             | ✓                 |                | ✓            |                                                         |                                                          |                                                        |                                             |   | ✓ |   |
| PCP 7                                                             | 7               |        | ✓      |               | ✓     | ✓                                  |             |             |             |             |                   | ✓              |              | ✓                                                       |                                                          |                                                        |                                             |   | ✓ |   |
| PCP 8                                                             | 8               | ✓      |        | ✓             |       |                                    |             | ✓           |             |             |                   | ✓              |              |                                                         | ✓                                                        |                                                        |                                             |   |   | ✓ |
| PCP 9                                                             | 8               | ✓      |        |               | ✓     |                                    |             | ✓           |             |             |                   | ✓              |              |                                                         | ✓                                                        |                                                        |                                             |   |   | ✓ |
| PCP 10                                                            | 9               | ✓      |        |               | ✓     |                                    | ✓           |             |             |             |                   |                | ✓            |                                                         |                                                          |                                                        |                                             |   |   | ✓ |
| PCP 11                                                            | 3               | ✓      |        |               | ✓     |                                    |             | ✓           |             |             |                   |                | ✓            |                                                         |                                                          | ✓                                                      |                                             |   | ✓ |   |
| PN 1                                                              | 1               |        | ✓      | ✓             |       |                                    | ✓           |             |             |             |                   |                | ✓            | ✓                                                       |                                                          |                                                        |                                             |   | ✓ |   |
| PN 2                                                              | 3               |        | ✓      | ✓             |       |                                    | ✓           |             |             |             | ✓                 |                |              |                                                         |                                                          | ✓                                                      |                                             |   | ✓ |   |
| PN 3                                                              | 6               |        | ✓      | ✓             |       |                                    | ✓           |             |             |             | ✓                 |                |              |                                                         |                                                          | ✓                                                      |                                             |   |   | ✓ |
| PN 4                                                              | 7               |        | ✓      | ✓             |       |                                    |             | ✓           |             |             | ✓                 |                |              | ✓                                                       |                                                          |                                                        |                                             |   | ✓ |   |
| PN 5                                                              | 8               |        | ✓      | ✓             |       |                                    | ✓           |             |             |             | ✓                 |                |              |                                                         | ✓                                                        |                                                        |                                             |   |   | ✓ |

Table 1: Health care professional characteristics

**Knowledge and understanding of the polypill**

*Would be used for cardiovascular disease prevention*

"[The polypill is]...hoping to reduce heart attacks and heart disease and stroke and things like that really...regardless of whether or not they have hypertension or ischemic heart disease at the time." (Primary care physician 4)

*Uncertainty over aspects of polypill*

"...you're only going to put these people on primary prevention if they're at risk, aren't you? It's not for everybody is it?" (Primary care physician 10)

*Knowledge based on journals and media*

"...I don't know what the thinking behind the use of it is other than what I've read in the national press." (Primary care physician 8)

**Use of the polypill for primary prevention**

*Concerns regarding actual polypill*

"...one would intellectually feel that if you put five pills in a pill, or four pills in a pill, more people are gonna react to it than if you've got one pill." (Primary care physician 3)

"I think you need titration, individual titration of different medications for individual people...so I can't imagine that one pill will work for everybody." (Practice nurse 3)

*Unnecessary medicalisation*

"...its [the polypill] just another medication that you'd be committing the person to really...I just think it's unnecessary. I think we should be teaching people, well people, how to keep themselves well without offering them preventive things, in the way of medication that is." (Practice nurse 1)

*Lack of evidence demonstrating effectiveness*



1  
2  
3 "...if you've got evidence that it works, then it would be easy for me to support. No, the evidence doesn't exist."  
4

5 (Primary care physician 8)  
6

7 *Negative impact on patient lifestyle*  
8

9  
10 "...it may very well give people a false sense of security...they'll continue to eat and drink too much, and smoke too much  
11 and take the polypill...it may make no difference whatsoever to them." (Primary care physician 4)  
12

13  
14 *May reduce cardiovascular disease risk*  
15

16  
17 "...the possibilities are that it might reduce a populations' risk of heart disease and stroke." (Primary care physician 11)  
18

19  
20 "You would reach a population that you wouldn't otherwise reach, then you're broadening the service you're providing  
21 and reducing cardiovascular risk." (Primary care physician 8)  
22

23  
24 *Should only be for those with risk factors*  
25

26  
27 "It [the polypill] should only be for those at risk of a cardiovascular attack...especially if there's any history of  
28 cardiovascular disease in the family." (Primary care physician 2)  
29

30  
31 ***Use of the polypill for secondary prevention***  
32

33  
34 *Practical for patients*  
35

36  
37 "...it just saves taking lots of tablets often: I think compliance probably would be better." (Practice nurse 5)  
38

39  
40 *Lack of purpose*  
41

42  
43 "...secondary prevention: I'm not so sure about because we are supposed to be treating these patients anyway...so there  
44 is a question really about...well the purpose really." (Primary care physician 11)  
45  
46  
47  
48  
49  
50  
51

52  
53  
54 Table 2: Attitude towards the Polypill  
55

**Regular monitoring of patients**

*To check it is safe and effective*

"...how will you know it's actually being effective in terms of reducing blood pressure if it's not monitored?" (Practice nurse 3)

"...you need to see the side-effects...by monitoring. You need to see whether they are developing anything else as well."  
(Primary care physician 7)

*To screen for and encourage compliance*

"...just to reassure [patients] that yes it is working, because I think some people might stop taking it and then not bother coming back, and then you've got problems with non-compliance again." (Practice nurse 5)

*Medications are normally monitored*

"...if someone's on a drug then historically they are monitored...not to monitor would be difficult." (Practice nurse 4)

*Polypill is only feasible with no monitoring*

"I think the polypill is only feasible if there is no monitoring associated with it...it's probably only feasible if the dose is considered safe enough not to be monitored." (Primary care physician 11)

**Minimal monitoring of patients**

*Cause for concern*

"That as a GP does not sit comfortably...if you're prescribing medication you have an ethical and a moral obligation to monitor this person." (Primary care physician 10)

"You don't give people medicines without seeing what it's going to do: that's pure negligent..." (Primary care physician 1)

*Need to see the evidence*

"So if the evidence was you don't have to monitor a polypill then I would say fine...but you've got to give me the evidence that that's an okay way to behave before I would consider that..." (Primary care physician 8)

*Would still monitor*

"...if the advice was saying not to monitor I'd still want to...for the patients sake and my sake." (Primary care physician 6)

Table 3: Monitoring patients taking the Polypill

**Personal factors**

"...it's not my ethos to medicate well people to prevent the normal ageing process..." (Primary care physician 8)

"I just don't believe that there's a pill for every ill...later in life you are probably going to develop some problems with your blood pressure and maybe your cholesterol levels won't stay the same...I think you really have to live with them, you can't expect to be taking a tablet for every little change that's happening in your body." (Practice nurse 1)

**Drug factors (cost, monitoring, titration)**

"...if it's researched based, it's shown to have fantastic results, it's cost effective...yes I would prescribe it." (Practice nurse 2)

"...I would be happy prescribing it if I could watch people carefully for a while and see how they feel about it." (Practice nurse 3)

"...unless there are different doses of combinations of polypills, just giving one to somebody might not necessarily be the right one for that person." (Primary care physician 10)

**External factors (evidence, guidance)**

"...I would be happy [to prescribe the polypill], provided I've got enough data to go on...I think everything hinges on that actually." (Primary care physician 7)

"If our PCT and the Department of Health feel it's a good thing, then yes I would prescribe it." (Practice nurse 2)

**Patient factors (risk level, patient choice, previous side-effects, existing cardiovascular disease, compliance, other medical conditions/medications, age)**

"...patients would have to be selected on the basis of their family history...if the family history contains ischaemic heart disease then they're the ones we should be picking first." (Primary care physician 4)

"I think we should give patients options. I don't think we should be saying "oh that is the one". It's very much a personal choice for the patient." (Primary care physician 5)

1  
2  
3 “Somebody who’s had an adverse reaction to any of those things that are in it [the polypill], I honestly wouldn’t  
4 prescribe it, just like you wouldn’t prescribe that drug to them.” (Primary care physician 2)  
5  
6  
7 “Secondary prevention patients – if we’re going to combine some of the medications that they’re already on into a  
8 polypill so they’re taking fewer tablets...they might be interested.” (Primary care physician 1)  
9  
10  
11 “...it very much depends on the type of patient...some people will probably just be happier to take one pill rather than a  
12 couple...people who have a problem with compliance...it would be the right one for them...” (Primary care physician 5)  
13  
14  
15 “...I don’t know if it is contraindicated with people with certain conditions or people who are on certain medications like  
16 warfarin for instance...that could be a barrier.” (Practice nurse 2)  
17  
18  
19 “If they haven’t got any risk factors for cardiovascular disease, I don’t think everybody over the age of 50 should be  
20 taking it. I don’t think I’ll agree to that.” (Primary care physician 5)  
21  
22  
23 “...[the polypill] couldn’t just be handed out to everybody over the age of 50, unless the studies and research suggested  
24 that there were no adverse effects and anyone could take the drug...even if they didn’t have hypertension.” (Practice  
25 nurse 4)  
26  
27  
28  
29  
30  
31  
32  
33  
34  
35  
36  
37  
38  
39  
40  
41  
42  
43  
44  
45  
46  
47  
48  
49  
50  
51  
52  
53  
54  
55  
56  
57  
58  
59  
60

Table 4: Prescribing the Polypill

## References

1. Mathers CD, Boerma T, Ma Fat D. Global and regional causes of death. *Br Med Bull.* 2009;92:7-32.
2. Psaty BM, Lumley T, Furberg CD, et al. Health outcomes associated with various antihypertensive therapies used as first-line agents: a network meta-analysis. *JAMA.* May 21 2003;289(19):2534-2544.
3. PROGRESS Collaborative Group. Randomised trial of a perindopril-based blood-pressure-lowering regimen among 6,105 individuals with previous stroke or transient ischaemic attack. *Lancet.* Sep 29 2001;358(9287):1033-1041.
4. Law MR, Wald NJ, Rudnicka AR. Quantifying effect of statins on low density lipoprotein cholesterol, ischaemic heart disease, and stroke: systematic review and meta-analysis. *BMJ.* Jun 28 2003;326(7404):1423.
5. National Institute for Health and Clinical Excellence. Hypertension: clinical management of primary hypertension in adults. CG1272011.
6. National Institute for Health and Clinical Excellence. Lipid modification: cardiovascular risk assessment and the modification of blood lipids for the primary and secondary prevention of cardiovascular disease. CG762008.
7. Sproston K, Primatesta P. *Health Survey for England 2003*2004.
8. Seddon ME, Marshall MN, Campbell SM, Roland MO. Systematic review of studies of quality of clinical care in general practice in the UK, Australia and New Zealand. *Qual Health Care.* Sep 2001;10(3):152-158.
9. Wald DS, Wald NJ. The polypill in the primary prevention of cardiovascular disease. *Fundam Clin Pharmacol.* Feb 2010;24(1):29-35.
10. Wald NJ, Law MR. A strategy to reduce cardiovascular disease by more than 80%. *BMJ.* Jun 28 2003;326(7404):1419.
11. Gupta AK, Arshad S, Poulter NR. Compliance, safety, and effectiveness of fixed-dose combinations of antihypertensive agents: a meta-analysis. *Hypertension.* Feb 2010;55(2):399-407.
12. Bangalore S, Kamalakkannan G, Parkar S, Messerli FH. Fixed-dose combinations improve medication compliance: a meta-analysis. *Am J Med.* Aug 2007;120(8):713-719.
13. Holt S. New Zealand general practitioners' opinions of the polypill concept. *N Z Med J.* May 8 2009;122(1294):116-117.
14. Soliman EZ, Mendis S, Dissanayake WP, et al. A Polypill for primary prevention of cardiovascular disease: a feasibility study of the World Health Organization. *Trials.* 2011;12:3.
15. Viera AJ, Sheridan SL, Edwards T, Soliman EZ, Harris R, Furberg CD. Acceptance of a Polypill approach to prevent cardiovascular disease among a sample of U.S. physicians. *Prev Med.* Jan 2011;52(1):10-15.
16. Neergaard MA, Olesen F, Andersen RS, Sondergaard J. Qualitative description - the poor cousin of health research? *BMC Med Res Methodol.* 2009;9:52.
17. Sandelowski M. What's in a name? Qualitative description revisited. *Res Nurs Health.* Feb 2010;33(1):77-84.
18. Patton MQ. *Qualitative research and evaluation methods.* 3rd ed. ed. London: SAGE; 2002.
19. Strickland-Hodge B, Jepson MH. Identification and characterization of early and late prescribers in general practice. *J R Soc Med.* May 1982;75(5):341-345.
20. Hemingway H, Shipley M, Macfarlane P, Marmot M. Impact of socioeconomic status on coronary mortality in people with symptoms, electrocardiographic abnormalities, both or

- 1  
2  
3 neither: the original Whitehall study 25 year follow up. *J Epidemiol Commun H.*  
4 2000;54(7):510-516.
- 5 **21.** Noble M, Wright G, Dibben C, et al. The English Indices of Deprivation 2004 (revised). Report  
6 to the Office of the Deputy Prime Minister: London: Neighbourhood Renewal Unit, 2004.
- 7 **22.** Office for National Statistics. 2001 Census [Key Statistics for Local Authorities]. *Census Area*  
8 *Statistics*: Crown Copyright 2003. HMSO.
- 9 **23.** Office for National Statistics. Census 2001: Definitions: Crown Copyright 2004. HMSO.
- 10 **24.** Horne R, Weinman J, Hankins M. The beliefs about medicines questionnaire: The  
11 development and evaluation of a new method for assessing the cognitive representation of  
12 medication. *Psychol Health.* 1999;14(1):1-24.
- 13 **25.** Horne R, Weinman J. Patients' beliefs about prescribed medicines and their role in  
14 adherence to treatment in chronic physical illness. *J Psychosom Res.* Dec 1999;47(6):555-  
15 567.
- 16 **26.** Mardby AC, Akerlind I, Hedenrud T. General beliefs about medicines among doctors and  
17 nurses in out-patient care: a cross-sectional study. *BMC Fam Pract.* 2009;10:35.
- 18 **27.** Kumar K, Gordon C, Toescu V, et al. Beliefs about medicines in patients with rheumatoid  
19 arthritis and systemic lupus erythematosus: a comparison between patients of South Asian  
20 and White British origin. *Rheumatology (Oxford).* May 2008;47(5):690-697.
- 21 **28.** Ritchie J, Lewis J. *Qualitative research practice : a guide for social science students and*  
22 *researchers.* London: Sage Publications; 2003.
- 23 **29.** Pope C, Mays N. Reaching the parts other methods cannot reach: an introduction to  
24 qualitative methods in health and health services research. *BMJ.* Jul 1 1995;311(6996):42-45.
- 25 **30.** Glaser BG. The Constant Comparative Method of Qualitative-Analysis. *Soc Probl.*  
26 1965;12(4):436-445.
- 27 **31.** National Centre for Social Research. Framework: New dimensions in qualitative research  
28 (software), Version 1.1. 2009.
- 29 **32.** Stevenson FA, Barry CA, Britten N, Barber N, Bradley CP. Doctor-patient communication  
30 about drugs: the evidence for shared decision making. *Soc Sci Med.* Mar 2000;50(6):829-840.
- 31 **33.** Mason A. New medicines in primary care: a review of influences on general practitioner  
32 prescribing. *J Clin Pharm Ther.* Feb 2008;33(1):1-10.
- 33 **34.** Jacoby A, Smith M, Eccles M. A qualitative study to explore influences on general  
34 practitioners' decisions to prescribe new drugs. *Br J Gen Pract.* Feb 2003;53(487):120-125.
- 35 **35.** Matteson SM, Lincoln YS. Using Multiple Interviewers in Qualitative Research Studies The  
36 Influence of Ethic of Care Behaviors in Research Interview Settings. *Qual Inq.* Apr  
37 2009;15(4):659-674.
- 38 **36.** Polit DF, Beck CT. Generalization in quantitative and qualitative research: myths and  
39 strategies. *Int J Nurs Stud.* Nov 2010;47(11):1451-1458.
- 40 **37.** Guest G, Bunce A, Johnson L. How many interviews are enough? An experiment with data  
41 saturation and variability. *Field methods.* Feb 2006;18(1):59-82.
- 42  
43  
44  
45  
46  
47  
48  
49  
50  
51  
52  
53  
54  
55  
56  
57  
58  
59  
60



**Would primary health care professionals prescribe a polypill to manage cardiovascular risk? A qualitative interview study**

|                                 |                                                                                                                                                                                                                                                                                                                                                                                                                                                                                                    |
|---------------------------------|----------------------------------------------------------------------------------------------------------------------------------------------------------------------------------------------------------------------------------------------------------------------------------------------------------------------------------------------------------------------------------------------------------------------------------------------------------------------------------------------------|
| Journal:                        | <i>BMJ Open</i>                                                                                                                                                                                                                                                                                                                                                                                                                                                                                    |
| Manuscript ID:                  | bmjopen-2012-002498.R1                                                                                                                                                                                                                                                                                                                                                                                                                                                                             |
| Article Type:                   | Research                                                                                                                                                                                                                                                                                                                                                                                                                                                                                           |
| Date Submitted by the Author:   | 19-Feb-2013                                                                                                                                                                                                                                                                                                                                                                                                                                                                                        |
| Complete List of Authors:       | Virdee, Satnam; University of Birmingham, Primary Care Clinical Sciences<br>Greenfield, Sheila; University of Birmingham, Primary Care Clinical Sciences<br>Fletcher, Kate; University of Birmingham, Primary Care Clinical Sciences<br>McManus, Richard; University of Oxford, University of Oxford, Dept of Primary Health Care<br>Hobbs, Richard; University of Oxford, Dept of Primary Health Care<br>Mant, Jonathan; University of Cambridge, General Practice and Primary Care Research Unit |
| <b>Primary Subject Heading</b>: | Cardiovascular medicine                                                                                                                                                                                                                                                                                                                                                                                                                                                                            |
| Secondary Subject Heading:      | General practice / Family practice, Qualitative research                                                                                                                                                                                                                                                                                                                                                                                                                                           |
| Keywords:                       | Coronary heart disease < CARDIOLOGY, PRIMARY CARE, QUALITATIVE RESEARCH                                                                                                                                                                                                                                                                                                                                                                                                                            |
|                                 |                                                                                                                                                                                                                                                                                                                                                                                                                                                                                                    |

SCHOLARONE™  
Manuscripts

only

1  
2  
3 **Would primary health care professionals prescribe a polypill to manage**  
4  
5  
6 **cardiovascular risk? A qualitative interview study**  
7  
8

9 Satnam K Virdee, Sheila M Greenfield, Kate Fletcher, Richard J McManus, FD Richard Hobbs,  
10 Jonathan Mant.  
11

12  
13  
14  
15 Primary Care Clinical Sciences, NIHR National School for Primary Care Research, Primary  
16 Care Clinical Sciences Building, University of Birmingham, Edgbaston, Birmingham, B15 2TT  
17

18 Satnam K Virdee  
19

20 Research associate  
21

22 Sheila M Greenfield  
23

24 Professor  
25

26 Kate Fletcher  
27

28 Programme manager  
29

30  
31 Primary Care Health Sciences, NIHR National School for Primary Care Research, University of  
32 Oxford, 23-38 Hythe Bridge Street, Oxford, OX1 2ET  
33

34 Richard J McManus  
35

36 Professor  
37

38 FD Richard Hobbs  
39

40 Professor  
41

42 Primary Care Unit, University of Cambridge, Strangeways Research Laboratory, Worts  
43 Causeway, Cambridge, CB1 8RN  
44

45 Jonathan Mant  
46

47 Professor  
48

49  
50  
51  
52  
53 Correspondence to: Professor Sheila M Greenfield  
54 [s.m.greenfield@bham.ac.uk](mailto:s.m.greenfield@bham.ac.uk)  
55  
56  
57  
58  
59  
60



## Abstract

### Objectives

A 'polypill' containing both blood pressure and cholesterol lowering drugs could prevent up to 80% of cardiovascular disease events. Since little is known about the attitudes of primary health care professionals to use of such a pill for cardiovascular disease prevention, this study aimed to investigate opinions.

### Design

Semi-structured interviews were conducted with participants. A qualitative description approach was used to analyse and report the results.

### Setting

Participants were recruited from nine primary care practices in Birmingham.

### Participants

Sixteen health care professionals (11 primary care physicians and 5 practice nurses) were selected through purposive sampling to maximise variation of characteristics.

### Outcome measures

Outcome measures for this study were: the attitude of health care professionals towards the use of a polypill for primary and secondary cardiovascular disease prevention; their views on monitoring the drug; and the factors influencing their willingness to prescribe the medication.

### Results

1  
2  
3 Health care professionals expressed considerable concern over using a polypill for primary  
4 prevention for all people over a specific age, although there was greater acceptance of its  
5 use for secondary prevention. Regularly monitoring patients taking the polypill was deemed  
6 essential. Evidence of effectiveness, patient risk level and potential medicalisation were key  
7 determinants in willingness to prescribe such a pill.  
8  
9  
10  
11  
12  
13

### 14 **Conclusions**

15  
16  
17  
18 Primary health care professionals have significant concerns about the use of a polypill,  
19 particularly in the prevention of cardiovascular disease in people who are not regarded as  
20 being at 'high risk'. If a population based polypill strategy is to be successfully implemented,  
21 health care professionals will need to be convinced of the potential benefits of a drug based  
22 population approach to prevention.  
23  
24  
25  
26  
27  
28  
29  
30  
31  
32  
33  
34  
35  
36  
37  
38  
39  
40  
41  
42  
43  
44  
45  
46  
47  
48  
49  
50  
51  
52  
53  
54  
55  
56  
57  
58  
59  
60

## Article summary

### Article focus

- A 'polypill' containing several blood pressure and cholesterol lowering drugs has large theoretical benefits in terms of reducing cardiovascular morbidity. Short term trials have demonstrated its efficacy.
- Although small scale surveys of physicians suggest that the use of the polypill may be acceptable to health care professionals, they have not provided detailed data on attitudes to the polypill.
- The aim of this study was to investigate the attitude of health care professionals to the use of a polypill for cardiovascular disease prevention.

### Key messages

- There was considerable resistance towards the use of a polypill for the prevention of cardiovascular disease in people not regarded as being at 'high risk'.
- Evidence of efficacy was judged important but potential medicalisation and an ongoing need for monitoring were significant issues for many health care professionals.
- If a population based polypill strategy is to be introduced, significant barriers from professionals will need to be overcome.

### Strengths and limitations of this study

- The study's qualitative approach allowed a detailed exploration of attitudes not possible in quantitative surveys.

1  
2  
3  
4  
5  
6  
7  
8  
9  
10  
11  
12  
13  
14  
15  
16  
17  
18  
19  
20  
21  
22  
23  
24  
25  
26  
27  
28  
29  
30  
31  
32  
33  
34  
35  
36  
37  
38  
39  
40  
41  
42  
43  
44  
45  
46  
47  
48  
49  
50  
51  
52  
53  
54  
55  
56  
57  
58  
59  
60

- Conversely, we cannot comment on how prevalent the views expressed in this study are in the wider population of health care professionals.

For peer review only

1  
2  
3 **Funding:** This work was supported by the National Institute for Health Research Applied  
4  
5 Research funding scheme, grant number RP-PG-0606-1153. The views and opinions  
6  
7 expressed within the study do not necessarily reflect those of the Department of  
8  
9 Health/National Institute for Health Research.  
10  
11

12  
13 **Competing interests:** None declared.  
14

15  
16 **Contributors:** The study was designed by SKV, SMG, KF and JM. SKV conducted the  
17  
18 interviews, analysed the data and drafted the paper. SKV, SMG and JM contributed to  
19  
20 subsequent drafts. All authors critically revised the paper.  
21  
22

23  
24 **Data sharing statement:** No additional data available.  
25  
26  
27  
28  
29  
30  
31  
32  
33  
34  
35  
36  
37  
38  
39  
40  
41  
42  
43  
44  
45  
46  
47  
48  
49  
50  
51  
52  
53  
54  
55  
56  
57  
58  
59  
60

## Introduction

Cardiovascular disease remains the major cause of morbidity and mortality worldwide.<sup>1</sup>

There have been significant advances in the evidence base for cardiovascular disease prevention, particularly regarding pharmacological interventions aimed at lowering blood pressure<sup>2,3</sup> and cholesterol.<sup>4</sup> Guidelines recommend use of these agents for both secondary and primary prevention in people at raised cardiovascular risk.<sup>5,6</sup> However repeated surveys have shown many patients are not being treated as intensively as guidelines recommend.<sup>7-9</sup> Furthermore, the majority of cardiovascular events occur in people not at high risk using conventional risk calculators.<sup>10</sup> Therefore, offering a 'polypill' to everyone over a particular age (for example 55) has been proposed.<sup>11</sup> The original idea involved a six component pill (three blood pressure lowering agents; cholesterol lowering agent; folate; and aspirin), but due to question marks over the efficacy of folate and the appropriateness of aspirin use for primary prevention, this now typically involves a single daily combined pill containing just blood pressure and cholesterol lowering agents. Since the idea was first raised, the evidence base for the potential role of a polypill has grown. There is more evidence that the effect of blood pressure lowering on cardiovascular risk is independent of baseline blood pressure,<sup>12</sup> and that reduction of LDL cholesterol is beneficial in those at low risk of vascular disease.<sup>13</sup> Meta-analysis of early trials show that polypills do indeed lower blood pressure and serum cholesterol levels.<sup>14</sup>

The polypill may also have a role in people with known cardiovascular risk factors, since it may lead to better patient adherence.<sup>15,16</sup> Wald and Law<sup>11</sup> estimate adopting a polypill strategy could prevent 80% of strokes and 88% of ischaemic heart disease events, with low risk of adverse effects.

1  
2  
3 If used in the UK, it is likely that the polypill would largely be prescribed and monitored  
4  
5 within primary care. Implementation would require considerable professional engagement  
6  
7 but to date there has been limited research on the polypill's professional acceptability.  
8  
9

10 Three small practitioner surveys have been conducted, but none in the UK. Holt<sup>17</sup> found  
11  
12 from a survey of 17 New Zealand primary care physicians almost all were familiar with the  
13  
14 polypill. They were keen on its simplicity and the likely increased compliance, but disliked  
15  
16 the lack of flexibility of the components and doses. More recently, Soliman et al<sup>18</sup> surveyed  
17  
18 58 Sri Lankan physicians and discovered a high degree of acceptability of prescribing the  
19  
20 polypill for primary prevention and even higher for secondary prevention. Viera et al's<sup>19</sup>  
21  
22 findings from a survey of 952 US physicians also revealed relatively high acceptance, but low  
23  
24 agreement to minimal monitoring. Such surveys whilst useful in gauging high level opinion,  
25  
26 cannot explore detailed issues around acceptability in any depth.  
27  
28  
29

30  
31  
32 The polypill has been used in a range of settings. This paper reports on a study in  
33  
34 Birmingham, UK, which used a qualitative description approach<sup>20,21</sup> to investigate UK health  
35  
36 care professionals' i.e. primary care physicians' and practice nurses' attitude towards using  
37  
38 the polypill for cardiovascular disease prevention and the drug's practicality for monitoring  
39  
40 and prescribing.  
41  
42  
43  
44  
45  
46  
47  
48  
49  
50  
51  
52  
53  
54  
55  
56  
57  
58  
59  
60

## Method

### Participants and sampling

11 Birmingham primary care practices agreed to participate of 20 initially approached. Practices were purposively selected to maximise variation in our sample.<sup>22</sup> They were chosen to represent different sizes (number of full-time equivalent primary care physicians) as practice size is known to affect prescribing behaviour.<sup>23</sup> Practices were also selected to reflect different levels of socio-economic deprivation (Indices of Multiple Deprivation (IMD) score of the practice area) since cardiovascular need tends to be higher in practices based in relatively deprived areas.<sup>24</sup> The IMD score is a single deprivation score combining a number of indicators covering a range of economic, social and housing issues.<sup>25</sup> Scores were divided into quartiles, one representing the least deprived areas and four the most. To contextualise this work, Birmingham consists of a population of about one million people including diverse ethnic groups with one-third from a non-white background.<sup>26</sup>

The 56 primary care physicians and 22 practice nurses in the 11 practices were sent a postal questionnaire enquiring about their gender, ethnicity (2001 general census ethnic categories)<sup>27</sup> and year of qualification, together with a 'Beliefs about Medicines Questionnaire (BMQ)-General'.<sup>28</sup> This includes two scales (General-Harm and General-Overuse) to measure respondents' attitudes to medicines in general. High scores indicate a greater belief that medicines are harmful and overused. This was used for sampling to ensure a range of views on general medication usage. Since we wanted respondents with extreme views and moderate beliefs and there appeared to be different ways to interpret scores,<sup>29-31</sup> we divided respondents' scores into tertiles, scores between 8-15 being categorised as low, 16-22 as medium and 23-34 as high.



1  
2  
3 58 (74%) health care professionals returned a completed BMQ-General. Respondents were  
4  
5 sampled on these scores as well as a maximum variety of individual (occupation, gender,  
6  
7 ethnicity, qualification year) and organisational (practice size, practice IMD score)  
8  
9 characteristics to allow a diversity of responses to emerge. 50 health care professionals (41  
10  
11 primary care physicians and 9 practice nurses) were selected and approached by letter, and  
12  
13 16 (11 primary care physicians and 5 practice nurses) agreed to interview across 9 practices.  
14  
15  
16

### 17 18 **Interviews**

19  
20  
21 Semi-structured interviews were used to elicit health care professionals views as they  
22  
23 provide an opportunity for in-depth investigation of personal perspectives, detailed  
24  
25 understanding and chance for clarification.<sup>32</sup> The interview guide was developed through a  
26  
27 discussion of the polypill and cardiovascular disease literature by research team members  
28  
29 (SKV, SMG, KF and JM) and covered: health care professionals' understanding of the polypill;  
30  
31 their attitude towards its use; and prescribing and monitoring the drug. Ethical approval to  
32  
33 conduct the interviews was granted by the Birmingham, East, North and Solihull Research  
34  
35 Ethics Committee (08/H1206/91). Signed informed consent was obtained before the  
36  
37 interview. All interviews were carried out at the practices by one of the authors (SKV) from  
38  
39 March to October 2009. Interviews lasted between 30-60 minutes, were audio recorded  
40  
41 and transcribed verbatim.  
42  
43  
44  
45  
46

### 47 48 **Analysis**

49  
50  
51 All transcripts were checked against the recording for accuracy. As part of the process of  
52  
53 respondent validation,<sup>33</sup> health care professionals were sent a copy of their transcript and a  
54  
55 brief summary of the interview for comments. Only one additional comment was made.  
56  
57  
58  
59  
60

1  
2  
3 Although the advantages and disadvantages of this process have been documented,<sup>34</sup> since  
4  
5 this is the first qualitative study on the polypill and it was a new concept for interviewees, it  
6  
7 was felt important to do this.  
8  
9

10  
11 Throughout the analytic process each transcript was compared with others to develop  
12  
13 conceptualisations of the possible relations between various pieces of data and key areas.<sup>35</sup>  
14  
15 Interviews continued until the authors (SKV, SMG and KF) agreed saturation had been  
16  
17 achieved. Transcripts and field notes were read independently by the authors (SKV, SMG  
18  
19 and KF) and the subthemes identified in each key area.<sup>20</sup> These were discussed by the  
20  
21 multidisciplinary team of clinicians and non-clinicians and a thematic coding framework was  
22  
23 developed to code each transcript systematically. Framework software was used to aid data  
24  
25 organisation.<sup>36</sup>  
26  
27  
28  
29  
30  
31  
32  
33  
34  
35  
36  
37  
38  
39  
40  
41  
42  
43  
44  
45  
46  
47  
48  
49  
50  
51  
52  
53  
54  
55  
56  
57  
58  
59  
60

## Results

### Participants

There were similar numbers of men and women (table 1) but all practice nurses were female and most primary care physicians were male. Seven participants were from a minority ethnic group (3 Indian; 1 White Irish; 1 Chinese; and 2 other). Most gained their professional qualification between 1970 and 1989. Participants had a full range of attitudes towards medicines determined by their BMQ-General score, but the four respondents with more positive attitudes towards medicines were all practice nurses.

### Key areas

To facilitate comparison of comments and contextualise subthemes, these are presented within each of the three key areas: attitude towards the polypill; opinions on monitoring; and views on prescribing. The number of respondents discussing each subtheme is reported (denominator 16 participants)<sup>37</sup> in order to contextualise the findings and facilitate a comparison between respondents. Interview extracts representative of each subtheme are shown in tables 2-4. Comparison of the subthemes did not reveal any relationship between health care professionals' characteristics and their views on the polypill in managing cardiovascular risk.

### Attitude towards the polypill (table 2)

Health care professionals discussed their attitude towards the polypill in terms of what they already knew and understood about it, and their thoughts about using the medication for primary and secondary prevention.

### ***Knowledge and understanding of the polypill***

The majority of respondents (11) understood the polypill would be used for cardiovascular disease prevention, whether for primary or secondary prevention or indeed both, and that it would contain multiple ingredients. Beyond this, their knowledge appeared limited. Most (10) were uncertain about how they might use it, and what drugs at what doses would be in it. Some (3) mentioned their knowledge was based on what they had read in journals or seen in the media.

### ***Use of the polypill for primary prevention***

All interviewees (16) expressed concern about using the polypill for primary prevention for everyone over a specific age. Most concerns were regarding: potential side-effects; difficulty in identifying the ingredient(s) causing side-effects; and the built-in inability to titrate the ingredients and dose. Other concerns raised were: unnecessary medicalisation of healthy people; lack of evidence demonstrating effectiveness; and the potential negative impact on health related behaviour, possibly leading to complacency about leading a healthy lifestyle.

Despite apprehension, half of health care professionals (8) recognised the possible advantages of administering a polypill to everyone over a specific age: mainly the potential to reduce the risk of developing cardiovascular disease at a population level. Hence a number (5) were receptive towards a population approach, although the majority (10) thought the polypill should only be given to those with cardiovascular disease risk factors.

### ***Use of the polypill for secondary prevention***

1  
2  
3 Of those interviewees (8) who discussed using the polypill for secondary prevention, most  
4  
5 (6) appeared positive believing it would be more practical for patients to take thereby  
6  
7 improving compliance. However, a minority (2) questioned its value for secondary  
8  
9 prevention as it would merely be a combined replacement of current cardiovascular disease  
10  
11 medication.  
12  
13

### 14 15 **Monitoring patients taking the polypill (table 3)** 16

17  
18 Health care professionals reflected upon both regular and minimal monitoring of patients  
19  
20 taking the polypill.  
21  
22

#### 23 24 ***Regular monitoring of patients*** 25

26  
27 Almost all participants (15) felt it was essential to regularly monitor patients taking the  
28  
29 polypill to: check the medication was both safe and effective, especially as it is a new drug;  
30  
31 screen for and encourage patient compliance; and because of the perception that most  
32  
33 prescribed medications require some degree of monitoring. Only one respondent felt  
34  
35 regular monitoring was unnecessary otherwise the polypill would become unfeasible,  
36  
37 although he highlighted the dose would need to be considered safe enough.  
38  
39  
40  
41

#### 42 43 ***Minimal monitoring of patients*** 44

45  
46 The idea of minimal monitoring of patients taking the polypill caused major unease amongst  
47  
48 most health care professionals (11), with two claiming such a strategy to be negligent.  
49

50  
51 Several (7) claimed they would need to see evidence that minimal monitoring was deemed  
52  
53 appropriate before they could be convinced to adopt this practice. Others (4) argued they  
54  
55 would monitor patients regularly even if the advice was that it was unnecessary.  
56  
57  
58  
59  
60

### **Prescribing the polypill (table 4)**

Although all health care professionals (16) would consider prescribing the polypill, there appeared to be several factors influencing their willingness. These could be divided into four groups relating to: their personal values; features of the drug; external issues; and patient factors.

#### **Personal factors**

For many respondents (10), personal beliefs regarding unnecessary medicalisation meant they would not prescribe the polypill without an indication in addition to age alone.

#### **Drug factors**

There were three important factors about the polypill that were deemed to have an influence on whether or not health care professionals would prescribe it: cost; monitoring; and titration. According to just under half (7) if the polypill was cost-effective for both patients and the National Health Service, they would be more likely to prescribe. However, others (5) stated cost would have no bearing on their decision if the outcome was beneficial. Some respondents (6) claimed they would be more willing to prescribe the polypill if they could monitor patients. Quite a few (6) had concerns over the inability to titrate it which meant they were reluctant about prescribing.

#### **External factors**

Two external factors, evidence and guidance from the Department of Health (DoH), seemed to impact on participants' decision to prescribe the polypill. Most (13) claimed the evidence

1  
2  
3 demonstrating the polypill to be safe, effective and beneficial would be a major determinant  
4  
5 in their judgement. Two said if the DoH endorsed its prescribing, they would then do so.  
6  
7

### 8 Patient factors 9

10  
11 There were several patient factors (risk level, patient choice, previous side-effects, existing  
12  
13 cardiovascular disease, compliance, other medical conditions/medications) and one socio-  
14  
15 demographic factor (age) that influenced health care professionals views regarding  
16  
17 potential prescription of the polypill.  
18  
19

20  
21  
22 Most (10) claimed they would be more willing to prescribe the medication as a preventative  
23  
24 measure for people with risk factors. Many (9) also believed their willingness would be  
25  
26 influenced by the patient's choice to take the medication. A number of participants (7)  
27  
28 mentioned they would not offer the polypill to patients who had experienced previous side-  
29  
30 effects from the individual ingredients. Several (6) believed they would prescribe the  
31  
32 polypill for patients on treatment for existing cardiovascular disease as a replacement for  
33  
34 practical reasons. Others (4) thought they would avoid medicating these patients with the  
35  
36 polypill since they require titrated dosages. Where patients had problems complying with  
37  
38 multiple medications, some respondents (4) said they would be more likely to prescribe the  
39  
40 polypill. A few (4) also suggested they would be less keen to offer the polypill to patients  
41  
42 with complex medical conditions or who were on certain medications due to possible  
43  
44 contra-indications.  
45  
46  
47  
48

49  
50  
51 In terms of age, the majority of interviewees (10) did not believe in prescribing the polypill  
52  
53 to everyone over 50 years for primary prevention unless there were risk factors. However,  
54  
55 several (5) claimed they would be willing to offer the medication to this population  
56  
57  
58  
59  
60

1  
2  
3 regardless of their risk level, as long as the evidence demonstrated it to be safe and  
4  
5 effective. In fact, one health care professional thought the age limit should be as low as 40  
6  
7 years for men. Some (4) said they would be happy to prescribe the polypill for the elderly as  
8  
9 it would be more practical for them to take, whereas others (2) maintained they would  
10  
11 avoid it for this group due to problems of polypharmacy.  
12  
13  
14  
15  
16  
17  
18  
19  
20  
21  
22  
23  
24  
25  
26  
27  
28  
29  
30  
31  
32  
33  
34  
35  
36  
37  
38  
39  
40  
41  
42  
43  
44  
45  
46  
47  
48  
49  
50  
51  
52  
53  
54  
55  
56  
57  
58  
59  
60

For peer review only



## Discussion

### Summary of main findings

Health care professionals were sceptical about the role of a polypill. A major concern was they did not feel the evidence base for a polypill had been established. They were particularly reluctant to prescribe on the basis of age and felt ongoing monitoring of blood pressure and cholesterol would be required. The inability to titrate dose in the polypill was seen as a further disadvantage. There was greater willingness to consider its use for secondary prevention, but with the same provisos about wanting to continue monitoring and with concerns about inability to adjust dose.

### Comparison with existing literature

As with a previous survey study,<sup>18</sup> we found health care professionals were more accepting of a polypill for secondary prevention perhaps because for those with existing cardiovascular disease there is a greater perceived need for medication. However, we discovered a lower level of acceptance for primary prevention, with more concerns regarding the pill itself. This may reflect typically slower uptake of new drugs by primary care physicians in the UK compared to other countries,<sup>38</sup> with many describing themselves as 'cautious' or 'conservative' in their prescribing behaviour.<sup>39</sup>

In our study, health care professionals disliked the concept of minimal monitoring of patients taking the polypill, a finding consistent with earlier studies.<sup>18,19</sup> This reflects current practice where patients are monitored for a number of reasons, including side-effects, effectiveness and compliance. Nevertheless, current National Institute for Health and

1  
2  
3 Clinical Excellence guidelines on lipid lowering therapy for primary prevention do not  
4  
5 recommend monitoring,<sup>6</sup> so attitudes may change.  
6  
7

### 8 9 **Strengths and limitations**

10  
11 A study strength is that all interviews were carried out by a single researcher thereby  
12  
13 ensuring consistency.<sup>40</sup> The researcher was non-medical, and health care professionals'  
14  
15 responses may have been different if the researcher had been a clinician.  
16  
17

18  
19 The study's qualitative approach allowed an in-depth exploration of attitudes not possible in  
20  
21 quantitative surveys. Study participants were recruited from a single major city. Sixteen of  
22  
23 the 50 approached were interviewed and we are not able to comment on how prevalent the  
24  
25 views expressed in this study are in the wider population of primary health care  
26  
27 professionals or those from other healthcare systems. Also, what respondents suggested  
28  
29 they would do is not necessarily what they would actually do in reality.  
30  
31  
32

33  
34 Although the aim of qualitative research is not to be generalisable,<sup>41</sup> we did have a  
35  
36 representative sample of respondents across gender and ethnicity. Our sample size was  
37  
38 also sufficient to achieve saturation.<sup>42</sup>  
39  
40  
41

### 42 43 **Implications**

44  
45 This study suggests despite potential acceptance of use of a polypill for secondary  
46  
47 prevention, health care professionals interviewed remained concerned that monitoring  
48  
49 should continue. With regard to primary prevention, there was considerable resistance to a  
50  
51 population strategy offering the polypill to everyone over a certain age. This reflected both  
52  
53 a concern about the lack of empirical evidence of the polypill's effectiveness and safety, and  
54  
55 a concern regarding medicalisation. If a polypill is to be used in this way, based on our  
56  
57  
58  
59  
60

1  
2  
3 respondents views it is likely health care professionals would need to be convinced about  
4  
5 the potential benefits of a drug based population approach to prevention.  
6  
7  
8  
9  
10  
11  
12  
13  
14  
15  
16  
17  
18  
19  
20  
21  
22  
23  
24  
25  
26  
27  
28  
29  
30  
31  
32  
33  
34  
35  
36  
37  
38  
39  
40  
41  
42  
43  
44  
45  
46  
47  
48  
49  
50  
51  
52  
53  
54  
55  
56  
57  
58  
59  
60

For peer review only

1  
2  
3  
4  
5  
6  
7  
8  
9  
10  
11  
12  
13  
14  
15  
16  
17  
18  
19  
20  
21  
22  
23  
24  
25  
26  
27  
28  
29  
30  
31  
32  
33  
34  
35  
36  
37  
38  
39  
40  
41  
42  
43  
44  
45  
46  
47  
48  
49

| Profession             | Gender         |        | Ethnicity     |       | Year of professional qualification |           |           |           |           | Prescribing rights |                 | BMQ-General score |                |              | Practice size                                           |                                                          |                                                        | Indices of Multiple Deprivation (Quartiles) |   |   |   |   |
|------------------------|----------------|--------|---------------|-------|------------------------------------|-----------|-----------|-----------|-----------|--------------------|-----------------|-------------------|----------------|--------------|---------------------------------------------------------|----------------------------------------------------------|--------------------------------------------------------|---------------------------------------------|---|---|---|---|
|                        | Male           | Female | White British | Other | 1960-1969                          | 1970-1979 | 1980-1989 | 1990-1999 | 2000-2009 | Prescribers        | Non-Prescribers | Low (8-15)        | Medium (16-22) | High (23-34) | Small (1-2 full-time equivalent primary care physician) | Medium (3-4 full-time equivalent primary care physician) | Large (5≥ full-time equivalent primary care physician) | 1                                           | 2 | 3 | 4 |   |
| Primary Care Physician | Practice Nurse | 9      | 7             | 9     | 7                                  | 1         | 7         | 6         | 0         | 2                  | 11              | 5                 | 4              | 8            | 4                                                       | 7                                                        | 6                                                      | 3                                           | 2 | 2 | 7 | 5 |

Table 1: Health care professional characteristics

**Knowledge and understanding of the polypill***Would be used for cardiovascular disease prevention*

"[The polypill is]...hoping to reduce heart attacks and heart disease and stroke and things like that really...regardless of whether or not they have hypertension or ischemic heart disease at the time." (Primary care physician 4)

*Uncertainty over aspects of polypill*

"...you're only going to put these people on primary prevention if they're at risk, aren't you? It's not for everybody is it?" (Primary care physician 10)

*Knowledge based on journals and media*

"...I don't know what the thinking behind the use of it is other than what I've read in the national press." (Primary care physician 8)

**Use of the polypill for primary prevention***Concerns regarding actual polypill*

"...one would intellectually feel that if you put five pills in a pill, or four pills in a pill, more people are gonna react to it than if you've got one pill." (Primary care physician 3)

"I think you need titration, individual titration of different medications for individual people...so I can't imagine that one pill will work for everybody." (Practice nurse 3)

*Unnecessary medicalisation*

"...its [the polypill] just another medication that you'd be committing the person to really...I just think it's unnecessary. I think we should be teaching people, well people, how to keep themselves well without offering them preventive things, in the way of medication that is." (Practice nurse 1)

*Lack of evidence demonstrating effectiveness*

1  
2  
3 "...if you've got evidence that it works, then it would be easy for me to support. No, the evidence doesn't exist."  
4

5 (Primary care physician 8)  
6

7  
8 *Negative impact on patient lifestyle*  
9

10 "...it may very well give people a false sense of security...they'll continue to eat and drink too much, and smoke too much  
11 and take the polypill...it may make no difference whatsoever to them." (Primary care physician 4)  
12

13  
14  
15 *May reduce cardiovascular disease risk*  
16

17  
18 "...the possibilities are that it might reduce a populations' risk of heart disease and stroke." (Primary care physician 11)  
19

20  
21 "You would reach a population that you wouldn't otherwise reach, then you're broadening the service you're providing  
22 and reducing cardiovascular risk." (Primary care physician 8)  
23

24  
25 *Should only be for those with risk factors*  
26

27  
28 "It [the polypill] should only be for those at risk of a cardiovascular attack...especially if there's any history of  
29 cardiovascular disease in the family." (Primary care physician 2)  
30  
31

32  
33  
34  
35  
36 ***Use of the polypill for secondary prevention***  
37

38  
39 *Practical for patients*  
40

41 "...it just saves taking lots of tablets often: I think compliance probably would be better." (Practice nurse 5)  
42

43  
44 *Lack of purpose*  
45

46  
47 "...secondary prevention: I'm not so sure about because we are supposed to be treating these patients anyway...so there  
48 is a question really about...well the purpose really." (Primary care physician 11)  
49  
50  
51

52  
53  
54 Table 2: Attitude towards the Polypill  
55  
56  
57  
58  
59  
60

**Regular monitoring of patients***To check it is safe and effective*

"...how will you know it's actually being effective in terms of reducing blood pressure if it's not monitored?" (Practice nurse 3)

"...you need to see the side-effects...by monitoring. You need to see whether they are developing anything else as well."  
(Primary care physician 7)

*To screen for and encourage compliance*

"...just to reassure [patients] that yes it is working, because I think some people might stop taking it and then not bother coming back, and then you've got problems with non-compliance again." (Practice nurse 5)

*Medications are normally monitored*

"...if someone's on a drug then historically they are monitored...not to monitor would be difficult." (Practice nurse 4)

*Polypill is only feasible with no monitoring*

"I think the polypill is only feasible if there is no monitoring associated with it...it's probably only feasible if the dose is considered safe enough not to be monitored." (Primary care physician 11)

**Minimal monitoring of patients***Cause for concern*

"That as a GP does not sit comfortably...if you're prescribing medication you have an ethical and a moral obligation to monitor this person." (Primary care physician 10)

"You don't give people medicines without seeing what it's going to do: that's pure negligent..." (Primary care physician 1)

*Need to see the evidence*

"So if the evidence was you don't have to monitor a polypill then I would say fine...but you've got to give me the evidence that that's an okay way to behave before I would consider that..." (Primary care physician 8)

*Would still monitor*

"...if the advice was saying not to monitor I'd still want to...for the patients sake and my sake." (Primary care physician 6)

Table 3: Monitoring patients taking the Polypill

**Personal factors**

"...it's not my ethos to medicate well people to prevent the normal ageing process..." (Primary care physician 8)

"I just don't believe that there's a pill for every ill...later in life you are probably going to develop some problems with your blood pressure and maybe your cholesterol levels won't stay the same...I think you really have to live with them, you can't expect to be taking a tablet for every little change that's happening in your body." (Practice nurse 1)

**Drug factors (cost, monitoring, titration)**

"...if it's researched based, it's shown to have fantastic results, it's cost effective...yes I would prescribe it." (Practice nurse 2)

"...I would be happy prescribing it if I could watch people carefully for a while and see how they feel about it." (Practice nurse 3)

"...unless there are different doses of combinations of polypills, just giving one to somebody might not necessarily be the right one for that person." (Primary care physician 10)

**External factors (evidence, guidance)**

"...I would be happy [to prescribe the polypill], provided I've got enough data to go on...I think everything hinges on that actually." (Primary care physician 7)

"If our PCT and the Department of Health feel it's a good thing, then yes I would prescribe it." (Practice nurse 2)

**Patient factors (risk level, patient choice, previous side-effects, existing cardiovascular disease, compliance, other medical conditions/medications, age)**

"...patients would have to be selected on the basis of their family history...if the family history contains ischaemic heart disease then they're the ones we should be picking first." (Primary care physician 4)

"I think we should give patients options. I don't think we should be saying "oh that is the one". It's very much a personal choice for the patient." (Primary care physician 5)



1  
2  
3 “Somebody who’s had an adverse reaction to any of those things that are in it [the polypill], I honestly wouldn’t  
4 prescribe it, just like you wouldn’t prescribe that drug to them.” (Primary care physician 2)  
5  
6  
7 “Secondary prevention patients – if we’re going to combine some of the medications that they’re already on into a  
8 polypill so they’re taking fewer tablets...they might be interested.” (Primary care physician 1)  
9  
10  
11 “...it very much depends on the type of patient...some people will probably just be happier to take one pill rather than a  
12 couple...people who have a problem with compliance...it would be the right one for them...” (Primary care physician 5)  
13  
14 “...I don’t know if it is contraindicated with people with certain conditions or people who are on certain medications like  
15 warfarin for instance...that could be a barrier.” (Practice nurse 2)  
16  
17  
18 “If they haven’t got any risk factors for cardiovascular disease, I don’t think everybody over the age of 50 should be  
19 taking it. I don’t think I’ll agree to that.” (Primary care physician 5)  
20  
21  
22 “...[the polypill] couldn’t just be handed out to everybody over the age of 50, unless the studies and research suggested  
23 that there were no adverse effects and anyone could take the drug...even if they didn’t have hypertension.” (Practice  
24 nurse 4)  
25  
26  
27  
28  
29

Table 4: Prescribing the Polypill

## References

1. Mathers CD, Boerma T, Ma Fat D. Global and regional causes of death. *Br Med Bull*. 2009;92:7-32.
2. Psaty BM, Lumley T, Furberg CD, et al. Health outcomes associated with various antihypertensive therapies used as first-line agents: a network meta-analysis. *JAMA*. May 21 2003;289(19):2534-2544.
3. PROGRESS Collaborative Group. Randomised trial of a perindopril-based blood-pressure-lowering regimen among 6,105 individuals with previous stroke or transient ischaemic attack. *Lancet*. Sep 29 2001;358(9287):1033-1041.
4. Law MR, Wald NJ, Rudnicka AR. Quantifying effect of statins on low density lipoprotein cholesterol, ischaemic heart disease, and stroke: systematic review and meta-analysis. *BMJ*. Jun 28 2003;326(7404):1423.
5. National Institute for Health and Clinical Excellence. Hypertension: clinical management of primary hypertension in adults. CG1272011.
6. National Institute for Health and Clinical Excellence. Lipid modification: cardiovascular risk assessment and the modification of blood lipids for the primary and secondary prevention of cardiovascular disease. CG762008.
7. Sproston K, Primatesta P. *Health Survey for England 20032004*.
8. Seddon ME, Marshall MN, Campbell SM, Roland MO. Systematic review of studies of quality of clinical care in general practice in the UK, Australia and New Zealand. *Qual Health Care*. Sep 2001;10(3):152-158.
9. Yusuf S, Islam S, Chow CK, et al. Use of secondary prevention drugs for cardiovascular disease in the community in high-income, middle-income, and low-income countries (the PURE Study): a prospective epidemiological survey. *Lancet*. 2011;378(9798):1231-1243.
10. Wald DS, Wald NJ. The polypill in the primary prevention of cardiovascular disease. *Fundam Clin Pharmacol*. Feb 2010;24(1):29-35.
11. Wald NJ, Law MR. A strategy to reduce cardiovascular disease by more than 80%. *BMJ*. Jun 28 2003;326(7404):1419.
12. Law MR, Morris JK, Wald NJ. Use of blood pressure lowering drugs in the prevention of cardiovascular disease: meta-analysis of 147 randomised trials in the context of expectations from prospective epidemiological studies. *BMJ (Clinical research ed)*. 2009;338:b1665.
13. Cholesterol Treatment Trialists C, Mihaylova B, Emberson J, et al. The effects of lowering LDL cholesterol with statin therapy in people at low risk of vascular disease: meta-analysis of individual data from 27 randomised trials. *Lancet*. 2012;380(9841):581-590.
14. Elley CR, Gupta AK, Webster R, et al. The efficacy and tolerability of 'polypills': meta-analysis of randomised controlled trials. *PLoS One*. 2012;7(12):e52145.
15. Gupta AK, Arshad S, Poulter NR. Compliance, safety, and effectiveness of fixed-dose combinations of antihypertensive agents: a meta-analysis. *Hypertension*. Feb 2010;55(2):399-407.
16. Bangalore S, Kamalakkannan G, Parkar S, Messerli FH. Fixed-dose combinations improve medication compliance: a meta-analysis. *Am J Med*. Aug 2007;120(8):713-719.
17. Holt S. New Zealand general practitioners' opinions of the polypill concept. *N Z Med J*. May 8 2009;122(1294):116-117.
18. Soliman EZ, Mendis S, Dissanayake WP, et al. A Polypill for primary prevention of cardiovascular disease: a feasibility study of the World Health Organization. *Trials*. 2011;12:3.
19. Viera AJ, Sheridan SL, Edwards T, Soliman EZ, Harris R, Furberg CD. Acceptance of a Polypill approach to prevent cardiovascular disease among a sample of U.S. physicians. *Prev Med*. Jan 2011;52(1):10-15.

- 1
  - 2
  - 3
  - 4
  - 5
  - 6
  - 7
  - 8
  - 9
  - 10
  - 11
  - 12
  - 13
  - 14
  - 15
  - 16
  - 17
  - 18
  - 19
  - 20
  - 21
  - 22
  - 23
  - 24
  - 25
  - 26
  - 27
  - 28
  - 29
  - 30
  - 31
  - 32
  - 33
  - 34
  - 35
  - 36
  - 37
  - 38
  - 39
  - 40
  - 41
  - 42
  - 43
  - 44
  - 45
  - 46
  - 47
  - 48
  - 49
  - 50
  - 51
  - 52
  - 53
  - 54
  - 55
  - 56
  - 57
  - 58
  - 59
  - 60
20. Neergaard MA, Olesen F, Andersen RS, Sondergaard J. Qualitative description - the poor cousin of health research? *BMC Med Res Methodol*. 2009;9:52.
21. Sandelowski M. What's in a name? Qualitative description revisited. *Res Nurs Health*. Feb 2010;33(1):77-84.
22. Patton MQ. *Qualitative research and evaluation methods*. 3rd ed. ed. London: SAGE; 2002.
23. Strickland-Hodge B, Jepson MH. Identification and characterization of early and late prescribers in general practice. *J R Soc Med*. May 1982;75(5):341-345.
24. Hemingway H, Shipley M, Macfarlane P, Marmot M. Impact of socioeconomic status on coronary mortality in people with symptoms, electrocardiographic abnormalities, both or neither: the original Whitehall study 25 year follow up. *J Epidemiol Commun H*. 2000;54(7):510-516.
25. Noble M, Wright G, Dibben C, et al. The English Indices of Deprivation 2004 (revised). Report to the Office of the Deputy Prime Minister: London: Neighbourhood Renewal Unit, 2004.
26. Office for National Statistics. 2001 Census [Key Statistics for Local Authorities]. *Census Area Statistics*: Crown Copyright 2003. HMSO.
27. Office for National Statistics. Census 2001: Definitions: Crown Copyright 2004. HMSO.
28. Horne R, Weinman J, Hankins M. The beliefs about medicines questionnaire: The development and evaluation of a new method for assessing the cognitive representation of medication. *Psychol Health*. 1999;14(1):1-24.
29. Horne R, Weinman J. Patients' beliefs about prescribed medicines and their role in adherence to treatment in chronic physical illness. *J Psychosom Res*. Dec 1999;47(6):555-567.
30. Mardby AC, Akerlind I, Hedenrud T. General beliefs about medicines among doctors and nurses in out-patient care: a cross-sectional study. *BMC Fam Pract*. 2009;10:35.
31. Kumar K, Gordon C, Toescu V, et al. Beliefs about medicines in patients with rheumatoid arthritis and systemic lupus erythematosus: a comparison between patients of South Asian and White British origin. *Rheumatology (Oxford)*. May 2008;47(5):690-697.
32. Ritchie J, Lewis J. *Qualitative research practice : a guide for social science students and researchers*. London: Sage Publications; 2003.
33. Pope C, Mays N. Reaching the parts other methods cannot reach: an introduction to qualitative methods in health and health services research. *BMJ*. Jul 1 1995;311(6996):42-45.
34. Carlson JA. Avoiding Traps in Member Checking. *The Qualitative Report*. 2010;15:1102-1113.
35. Glaser BG. The Constant Comparative Method of Qualitative-Analysis. *Soc Probl*. 1965;12(4):436-445.
36. National Centre for Social Research. Framework: New dimensions in qualitative research (software), Version 1.1. 2009.
37. Stevenson FA, Barry CA, Britten N, Barber N, Bradley CP. Doctor-patient communication about drugs: the evidence for shared decision making. *Soc Sci Med*. Mar 2000;50(6):829-840.
38. Mason A. New medicines in primary care: a review of influences on general practitioner prescribing. *J Clin Pharm Ther*. Feb 2008;33(1):1-10.
39. Jacoby A, Smith M, Eccles M. A qualitative study to explore influences on general practitioners' decisions to prescribe new drugs. *Br J Gen Pract*. Feb 2003;53(487):120-125.
40. Matteson SM, Lincoln YS. Using Multiple Interviewers in Qualitative Research Studies The Influence of Ethic of Care Behaviors in Research Interview Settings. *Qual Inq*. Apr 2009;15(4):659-674.
41. Polit DF, Beck CT. Generalization in quantitative and qualitative research: myths and strategies. *Int J Nurs Stud*. Nov 2010;47(11):1451-1458.
42. Guest G, Bunce A, Johnson L. How many interviews are enough? An experiment with data saturation and variability. *Field methods*. Feb 2006;18(1):59-82.

1  
2  
3  
4  
5  
6  
7  
8  
9  
10  
11  
12  
13  
14  
15  
16  
17  
18  
19  
20  
21  
22  
23  
24  
25  
26  
27  
28  
29  
30  
31  
32  
33  
34  
35  
36  
37  
38  
39  
40  
41  
42  
43  
44  
45  
46  
47  
48  
49  
50  
51  
52  
53  
54  
55  
56  
57  
58  
59  
60

For peer review only

1  
2  
3 **Would primary health care professionals prescribe a polypill to manage**  
4  
5  
6 **cardiovascular risk? A qualitative interview study**  
7  
8

9 Satnam K Virdee, Sheila M Greenfield, Kate Fletcher, Richard J McManus, FD Richard Hobbs,  
10 Jonathan Mant.  
11

12  
13  
14  
15 Primary Care Clinical Sciences, NIHR National School for Primary Care Research, Primary  
16 Care Clinical Sciences Building, University of Birmingham, Edgbaston, Birmingham, B15 2TT  
17

18 Satnam K Virdee  
19

20 Research associate  
21

22 Sheila M Greenfield  
23

24 Professor  
25

26 Kate Fletcher  
27

28 Programme manager  
29

30  
31 Primary Care Health Sciences, NIHR National School for Primary Care Research, University of  
32 Oxford, 23-38 Hythe Bridge Street, Oxford, OX1 2ET  
33

34 Richard J McManus  
35

36 Professor  
37

38 FD Richard Hobbs  
39

40 Professor  
41

42 Primary Care Unit, University of Cambridge, Strangeways Research Laboratory, Worts  
43 Causeway, Cambridge, CB1 8RN  
44

45 Jonathan Mant  
46

47 Professor  
48

49  
50  
51  
52  
53 Correspondence to: Professor Sheila M Greenfield  
54 [s.m.greenfield@bham.ac.uk](mailto:s.m.greenfield@bham.ac.uk)  
55  
56  
57  
58  
59  
60

1  
2  
3  
4  
5  
6  
7  
8  
9  
10  
11  
12  
13  
14  
15  
16  
17  
18  
19  
20  
21  
22  
23  
24  
25  
26  
27  
28  
29  
30  
31  
32  
33  
34  
35  
36  
37  
38  
39  
40  
41  
42  
43  
44  
45  
46  
47  
48  
49  
50  
51  
52  
53  
54  
55  
56  
57  
58  
59  
60

This article presents independent research funded by the National Institute for Health Research (NIHR) under the Programme Grants for Applied Research programme RP-PG-0606-1153. The views expressed in this publication are those of the author(s) and not necessarily those of the NHS, the NIHR or the Department of Health.

For peer review only

## Abstract

### Objectives

A 'polypill' containing both blood pressure and cholesterol lowering drugs could prevent up to 80% of cardiovascular disease events. Since little is known about the attitudes of primary health care professionals to use of such a pill for cardiovascular disease prevention, this study aimed to investigate opinions.

### Design

Semi-structured interviews were conducted with participants. A qualitative description approach was used to analyse and report the results.

### Setting

Participants were recruited from nine primary care practices in Birmingham.

### Participants

Sixteen health care professionals (11 primary care physicians and 5 practice nurses) were selected through purposive sampling to maximise variation of characteristics.

### Outcome measures

Outcome measures for this study were: the attitude of health care professionals towards the use of a polypill for primary and secondary cardiovascular disease prevention; their views on monitoring the drug; and the factors influencing their willingness to prescribe the medication.

### Results

1  
2  
3 Health care professionals expressed considerable concern over using a polypill for primary  
4  
5 prevention for all people over a specific age, although there was greater acceptance of its  
6  
7 use for secondary prevention. Regularly monitoring patients taking the polypill was deemed  
8  
9 essential. Evidence of effectiveness, patient risk level and potential medicalisation were key  
10  
11 determinants in willingness to prescribe such a pill.  
12  
13

### 14 15 **Conclusions**

16  
17  
18 Primary health care professionals have significant concerns about the use of a polypill,  
19  
20 particularly in the prevention of cardiovascular disease in people who are not regarded as  
21  
22 being at 'high risk'. If a population based polypill strategy is to be successfully implemented,  
23  
24 health care professionals will need to be convinced of the potential benefits of a drug based  
25  
26 population approach to prevention.  
27  
28  
29  
30  
31  
32  
33  
34  
35  
36  
37  
38  
39  
40  
41  
42  
43  
44  
45  
46  
47  
48  
49  
50  
51  
52  
53  
54  
55  
56  
57  
58  
59  
60



## Article summary

### Article focus

- A 'polypill' containing several blood pressure and cholesterol lowering drugs has large theoretical benefits in terms of reducing cardiovascular morbidity. Short term trials have demonstrated its efficacy.
- Although small scale surveys of physicians suggest that the use of the polypill may be acceptable to health care professionals, they have not provided detailed data on attitudes to the polypill.
- The aim of this study was to investigate the attitude of health care professionals to the use of a polypill for cardiovascular disease prevention.

### Key messages

- There was considerable resistance towards the use of a polypill for the prevention of cardiovascular disease in people not regarded as being at 'high risk'.
- Evidence of efficacy was judged important but potential medicalisation and an ongoing need for monitoring were significant issues for many health care professionals.
- If a population based polypill strategy is to be introduced, significant barriers from professionals will need to be overcome.

### Strengths and limitations of this study

- The study's qualitative approach allowed a detailed exploration of attitudes not possible in quantitative surveys.

1  
2  
3  
4  
5  
6  
7  
8  
9  
10  
11  
12  
13  
14  
15  
16  
17  
18  
19  
20  
21  
22  
23  
24  
25  
26  
27  
28  
29  
30  
31  
32  
33  
34  
35  
36  
37  
38  
39  
40  
41  
42  
43  
44  
45  
46  
47  
48  
49  
50  
51  
52  
53  
54  
55  
56  
57  
58  
59  
60

- Conversely, we cannot comment on how prevalent the views expressed in this study are in the wider population of health care professionals.

For peer review only

1  
2  
3 **Funding:** This work was supported by the National Institute for Health Research Applied  
4  
5 Research funding scheme, grant number RP-PG-0606-1153. The views and opinions  
6  
7 expressed within the study do not necessarily reflect those of the Department of  
8  
9 Health/National Institute for Health Research.  
10  
11

12  
13 **Competing interests:** None declared.  
14  
15

16 **Contributors:** The study was designed by SKV, SMG, KF and JM. SKV conducted the  
17  
18 interviews, analysed the data and drafted the paper. SKV, SMG and JM contributed to  
19  
20 subsequent drafts. All authors critically revised the paper.  
21  
22

23  
24 **Data sharing statement:** No additional data available.  
25  
26  
27  
28  
29  
30  
31  
32  
33  
34  
35  
36  
37  
38  
39  
40  
41  
42  
43  
44  
45  
46  
47  
48  
49  
50  
51  
52  
53  
54  
55  
56  
57  
58  
59  
60

## Introduction

Cardiovascular disease remains the major cause of morbidity and mortality worldwide.<sup>1</sup>

There have been significant advances in the evidence base for cardiovascular disease prevention, particularly regarding pharmacological interventions aimed at lowering blood pressure<sup>2,3</sup> and cholesterol.<sup>4</sup> Guidelines recommend use of these agents for both secondary and primary prevention in people at raised cardiovascular risk.<sup>5,6</sup> However repeated surveys have shown many patients are not being treated as intensively as guidelines recommend.<sup>7,8</sup>

<sup>7-9</sup> Furthermore, the majority of cardiovascular events occur in people not at high risk using conventional risk calculators.<sup>10</sup> Therefore, offering a 'polypill' to everyone over a particular age (for example 55) has been proposed.<sup>11</sup> ~~This involves a single daily combined pill containing both blood pressure and cholesterol lowering agents at a fixed low dose (to reduce adverse effects) with minimal monitoring required, as opposed to titrating individual treatments to specific targets.~~ The original idea involved a six component pill (three blood pressure lowering agents; cholesterol lowering agent; folate; and aspirin), but due to question marks over the efficacy of folate and the appropriateness of aspirin use for primary prevention, this now typically involves a single daily combined pill containing just blood pressure and cholesterol lowering agents. Since the idea was first raised, the evidence base for the potential role of a polypill has grown. There is more evidence that the effect of blood pressure lowering on cardiovascular risk is independent of baseline blood pressure,<sup>12</sup> and that reduction of LDL cholesterol is beneficial in those at low risk of vascular disease.<sup>13</sup> Meta-analysis of early trials show that polypills do indeed lower blood pressure and serum cholesterol levels.<sup>14</sup>

1  
2  
3 The polypill may also have a role in people with known cardiovascular risk factors, since it  
4  
5 may lead to better patient adherence.<sup>15,16</sup> Wald and Law<sup>11</sup> estimate adopting a polypill  
6  
7 strategy could prevent 80% of strokes and 88% of ischaemic heart disease events, with low  
8  
9 risk of adverse effects.  
10

11  
12  
13 If used in the UK, it is likely that the polypill would largely be prescribed and monitored  
14  
15 within primary care. Implementation would require considerable professional engagement  
16  
17 but to date there has been limited research on the polypill's professional acceptability.  
18

19  
20 Three small practitioner surveys have been conducted, but none in the UK. Holt<sup>17</sup> found  
21  
22 from a survey of 17 New Zealand primary care physicians almost all were familiar with the  
23  
24 polypill. They were keen on its simplicity and the likely increased compliance, but disliked  
25  
26 the lack of flexibility of the components and doses. More recently, Soliman et al<sup>18</sup> surveyed  
27  
28 58 Sri Lankan physicians and discovered a high degree of acceptability of prescribing the  
29  
30 polypill for primary prevention and even higher for secondary prevention. Viera et al's<sup>19</sup>  
31  
32 findings from a survey of 952 US physicians also revealed relatively high acceptance, but low  
33  
34 agreement to minimal monitoring. Such surveys whilst useful in gauging high level opinion,  
35  
36 cannot explore detailed issues around acceptability in any depth.  
37  
38  
39  
40  
41

42 The polypill has been used in a range of settings. This paper reports on a study in  
43  
44 Birmingham, UK, which used a qualitative description approach<sup>20,21</sup> to investigate UK health  
45  
46 care professionals' i.e. primary care physicians' and practice nurses' attitude towards using  
47  
48 the polypill for cardiovascular disease prevention and the drug's practicality for monitoring  
49  
50 and prescribing.  
51  
52

## 53 54 55 **Method** 56 57 58 59 60

### Participants and sampling

11 Birmingham primary care practices agreed to participate of 20 initially approached. Practices were purposively selected to maximise variation in our sample.<sup>22</sup> They were chosen to represent different sizes (number of full-time equivalent primary care physicians) as practice size is known to affect prescribing behaviour.<sup>23</sup> Practices were also selected to reflect different levels of socio-economic deprivation (Indices of Multiple Deprivation (IMD) score of the practice area) since cardiovascular need tends to be higher in practices based in relatively deprived areas.<sup>24</sup> The IMD score is a single deprivation score combining a number of indicators covering a range of economic, social and housing issues.<sup>25</sup> Scores were divided into quartiles, one representing the least deprived areas and four the most. To contextualise this work, Birmingham consists of a population of about one million people including diverse ethnic groups with one-third from a non-white background.<sup>26</sup>

The 56 primary care physicians and 22 practice nurses in the 11 practices were sent a postal questionnaire enquiring about their gender, ethnicity (2001 general census ethnic categories)<sup>27</sup> and year of qualification, together with a 'Beliefs about Medicines Questionnaire (BMQ)-General'.<sup>28</sup> This includes two scales (General-Harm and General-Overuse) to measure respondents' attitudes to medicines in general. High scores indicate a greater belief that medicines are harmful and overused. This was used for sampling to ensure a range of views on general medication usage. Since we wanted respondents with extreme views and moderate beliefs and there appeared to be different ways to interpret scores,<sup>29-31</sup> we divided respondents' scores into tertiles, scores between 8-15 being categorised as low, 16-22 as medium and 23-34 as high.

1  
2  
3 58 (74%) health care professionals returned a completed BMQ-General. Respondents were  
4  
5 sampled on these scores as well as a maximum variety of individual (occupation, gender,  
6  
7 ethnicity, qualification year) and organisational (practice size, practice IMD score)  
8  
9 characteristics to allow a diversity of responses to emerge. 50 health care professionals (41  
10  
11 primary care physicians and 9 practice nurses) were selected and approached by letter, and  
12  
13 16 (11 primary care physicians and 5 practice nurses) agreed to interview across 9 practices.  
14  
15  
16

### 17 18 **Interviews**

19  
20  
21 Semi-structured interviews were used to elicit health care professionals views as they  
22  
23 provide an opportunity for in-depth investigation of personal perspectives, detailed  
24  
25 understanding and chance for clarification.<sup>32</sup> The interview guide was developed through a  
26  
27 discussion of the polypill and cardiovascular disease literature by research team members  
28  
29 (SKV, SMG, KF and JM) and covered: health care professionals' understanding of the polypill;  
30  
31 their attitude towards its use; and prescribing and monitoring the drug. Ethical approval to  
32  
33 conduct the interviews was granted by the Birmingham, East, North and Solihull Research  
34  
35 Ethics Committee (08/H1206/91). Signed informed consent was obtained before the  
36  
37 interview. All interviews were carried out at the practices by one of the authors (SKV) from  
38  
39 March to October 2009. Interviews lasted between 30-60 minutes, were audio recorded  
40  
41 and transcribed verbatim.  
42  
43  
44  
45  
46  
47

### 48 **Analysis**

49  
50  
51 All transcripts were checked against the recording for accuracy. As part of the process of  
52  
53 respondent validation,<sup>33</sup> health care professionals were sent a copy of their transcript and a  
54  
55 brief summary of the interview for comments. Only one additional comment was made.  
56  
57  
58  
59  
60

1  
2  
3 Although the advantages and disadvantages of this process have been documented,<sup>34</sup> since  
4 this is the first qualitative study on the polypill and it was a new concept for interviewees, it  
5 was felt important to do this.  
6  
7  
8  
9

10  
11 Throughout the analytic process each transcript was compared with others to develop  
12 conceptualisations of the possible relations between various pieces of data and key areas.<sup>35</sup>  
13 Interviews continued until the authors (SKV, SMG and KF) agreed saturation had been  
14 achieved. Transcripts and field notes were read independently by the authors (SKV, SMG  
15 and KF) and the subthemes identified in each key area.<sup>20</sup> These were discussed by the  
16 multidisciplinary team of clinicians and non-clinicians and a thematic coding framework was  
17 developed to code each transcript systematically. Framework software was used to aid data  
18 organisation.<sup>36</sup>  
19  
20  
21  
22  
23  
24  
25  
26  
27  
28  
29  
30  
31  
32  
33  
34  
35  
36  
37  
38  
39  
40  
41  
42  
43  
44  
45  
46  
47  
48  
49  
50  
51  
52  
53  
54  
55  
56  
57  
58  
59  
60



## Results

### Participants

There were similar numbers of men and women (table 1) but all practice nurses were female and most primary care physicians were male. Seven participants were from a minority ethnic group (3 Indian; 1 White Irish; 1 Chinese; and 2 other). Most gained their professional qualification between 1970 and 1989. Participants had a full range of attitudes towards medicines determined by their BMQ-General score, but the four respondents with more positive attitudes towards medicines were all practice nurses.

### Key areas

To facilitate comparison of comments and contextualise subthemes, these are presented within each of the three key areas: attitude towards the polypill; opinions on monitoring; and views on prescribing. The number of respondents discussing each subtheme is reported (denominator 16 participants)<sup>32 37</sup> in order to contextualise the findings and facilitate a comparison between respondents. Interview extracts representative of each subtheme are shown in tables 2-4. Comparison of the subthemes did not reveal any relationship between health care professionals' characteristics and their views on the polypill in managing cardiovascular risk.

### Attitude towards the polypill (table 2)

Health care professionals discussed their attitude towards the polypill in terms of what they already knew and understood about it, and their thoughts about using the medication for primary and secondary prevention.

### ***Knowledge and understanding of the polypill***

The majority of respondents (11) understood the polypill would be used for cardiovascular disease prevention, whether for primary or secondary prevention or indeed both, and that it would contain multiple ingredients. Beyond this, their knowledge appeared limited. Most (10) were uncertain about how they might use it, and what drugs at what doses would be in it. Some (3) mentioned their knowledge was based on what they had read in journals or seen in the media.

### ***Use of the polypill for primary prevention***

All interviewees (16) expressed concern about using the polypill for primary prevention for everyone over a specific age. Most concerns were regarding: potential side-effects; difficulty in identifying the ingredient(s) causing side-effects; and the built-in inability to titrate the ingredients and dose. Other concerns raised were: unnecessary medicalisation of healthy people; lack of evidence demonstrating effectiveness; and the potential negative impact on health related behaviour, possibly leading to complacency about leading a healthy lifestyle.

Despite apprehension, half of health care professionals (8) recognised the possible advantages of administering a polypill to everyone over a specific age: mainly the potential to reduce the risk of developing cardiovascular disease at a population level. Hence a number (5) were receptive towards a population approach, although the majority (10) thought the polypill should only be given to those with cardiovascular disease risk factors.

### ***Use of the polypill for secondary prevention***

1  
2  
3 Of those interviewees (8) who discussed using the polypill for secondary prevention, most  
4  
5 (6) appeared positive believing it would be more practical for patients to take thereby  
6  
7 improving compliance. However, a minority (2) questioned its value for secondary  
8  
9 prevention as it would merely be a combined replacement of current cardiovascular disease  
10  
11 medication.  
12  
13

### 14 15 **Monitoring patients taking the polypill (table 3)** 16

17  
18 Health care professionals reflected upon both regular and minimal monitoring of patients  
19  
20 taking the polypill.  
21  
22

#### 23 24 ***Regular monitoring of patients*** 25

26  
27 Almost all participants (15) felt it was essential to regularly monitor patients taking the  
28  
29 polypill to: check the medication was both safe and effective, especially as it is a new drug;  
30  
31 screen for and encourage patient compliance; and because of the perception that most  
32  
33 prescribed medications require some degree of monitoring. Only one respondent felt  
34  
35 regular monitoring was unnecessary otherwise the polypill would become unfeasible,  
36  
37 although he highlighted the dose would need to be considered safe enough.  
38  
39  
40  
41

#### 42 43 ***Minimal monitoring of patients*** 44

45  
46 The idea of minimal monitoring of patients taking the polypill caused major unease amongst  
47  
48 most health care professionals (11), with two claiming such a strategy to be negligent.  
49

50  
51 Several (7) claimed they would need to see evidence that minimal monitoring was deemed  
52  
53 appropriate before they could be convinced to adopt this practice. Others (4) argued they  
54  
55 would monitor patients regularly even if the advice was that it was unnecessary.  
56  
57  
58  
59  
60

### **Prescribing the polypill (table 4)**

Although all health care professionals (16) would consider prescribing the polypill, there appeared to be several factors influencing their willingness. These could be divided into four groups relating to: their personal values; features of the drug; external issues; and patient factors.

#### **Personal factors**

For many respondents (10), personal beliefs regarding unnecessary medicalisation meant they would not prescribe the polypill without an indication in addition to age alone.

#### **Drug factors**

There were three important factors about the polypill that were deemed to have an influence on whether or not health care professionals would prescribe it: cost; monitoring; and titration. According to just under half (7) if the polypill was cost-effective for both patients and the National Health Service, they would be more likely to prescribe. However, others (5) stated cost would have no bearing on their decision if the outcome was beneficial. Some respondents (6) claimed they would be more willing to prescribe the polypill if they could monitor patients. Quite a few (6) had concerns over the inability to titrate it which meant they were reluctant about prescribing.

#### **External factors**

Two external factors, evidence and guidance from the Department of Health (DoH), seemed to impact on participants' decision to prescribe the polypill. Most (13) claimed the evidence

1  
2  
3 demonstrating the polypill to be safe, effective and beneficial would be a major determinant  
4  
5 in their judgement. Two said if the DoH endorsed its prescribing, they would then do so.  
6  
7

### 8 Patient factors 9

10  
11 There were several patient factors (risk level, patient choice, previous side-effects, existing  
12  
13 cardiovascular disease, compliance, other medical conditions/medications) and one socio-  
14  
15 demographic factor (age) that influenced health care professionals views regarding  
16  
17 potential prescription of the polypill.  
18  
19

20  
21 Most (10) claimed they would be more willing to prescribe the medication as a preventative  
22  
23 measure for people with risk factors. Many (9) also believed their willingness would be  
24  
25 influenced by the patient's choice to take the medication. A number of participants (7)  
26  
27 mentioned they would not offer the polypill to patients who had experienced previous side-  
28  
29 effects from the individual ingredients. Several (6) believed they would prescribe the  
30  
31 polypill for patients on treatment for existing cardiovascular disease as a replacement for  
32  
33 practical reasons. Others (4) thought they would avoid medicating these patients with the  
34  
35 polypill since they require titrated dosages. Where patients had problems complying with  
36  
37 multiple medications, some respondents (4) said they would be more likely to prescribe the  
38  
39 polypill. A few (4) also suggested they would be less keen to offer the polypill to patients  
40  
41 with complex medical conditions or who were on certain medications due to possible  
42  
43 contra-indications.  
44  
45  
46  
47  
48

49  
50 In terms of age, the majority of interviewees (10) did not believe in prescribing the polypill  
51  
52 to everyone over 50 years for primary prevention unless there were risk factors. However,  
53  
54 several (5) claimed they would be willing to offer the medication to this population  
55  
56  
57  
58  
59  
60

1  
2  
3 regardless of their risk level, as long as the evidence demonstrated it to be safe and  
4  
5 effective. In fact, one health care professional thought the age limit should be as low as 40  
6  
7 years for men. Some (4) said they would be happy to prescribe the polypill for the elderly as  
8  
9 it would be more practical for them to take, whereas others (2) maintained they would  
10  
11 avoid it for this group due to problems of polypharmacy.  
12  
13  
14  
15  
16  
17  
18  
19  
20  
21  
22  
23  
24  
25  
26  
27  
28  
29  
30  
31  
32  
33  
34  
35  
36  
37  
38  
39  
40  
41  
42  
43  
44  
45  
46  
47  
48  
49  
50  
51  
52  
53  
54  
55  
56  
57  
58  
59  
60

For peer review only

## Discussion

### Summary of main findings

Health care professionals were sceptical about the role of a polypill. A major concern was they did not feel the evidence base for a polypill had been established. They were particularly reluctant to prescribe on the basis of age and felt ongoing monitoring of blood pressure and cholesterol would be required. The inability to titrate dose in the polypill was seen as a further disadvantage. There was greater willingness to consider its use for secondary prevention, but with the same provisos about wanting to continue monitoring and with concerns about inability to adjust dose.

### Comparison with existing literature

As with a previous survey study,<sup>18</sup> we found health care professionals were more accepting of a polypill for secondary prevention perhaps because for those with existing cardiovascular disease there is a greater perceived need for medication. However, we discovered a lower level of acceptance for primary prevention, with more concerns regarding the pill itself. This may reflect typically slower uptake of new drugs by primary care physicians in the UK compared to other countries,<sup>38</sup> with many describing themselves as 'cautious' or 'conservative' in their prescribing behaviour.<sup>39</sup>

In our study, health care professionals disliked the concept of minimal monitoring of patients taking the polypill, a finding consistent with earlier studies.<sup>18,19</sup> This reflects current practice where patients are monitored for a number of reasons, including side-effects, effectiveness and compliance. Nevertheless, current National Institute for Health and

1  
2  
3 Clinical Excellence guidelines on lipid lowering therapy for primary prevention do not  
4  
5 recommend monitoring,<sup>6</sup> so attitudes may change.  
6  
7

### 8 **Strengths and limitations**

9  
10 A study strength is that all interviews were carried out by a single researcher thereby  
11  
12 ensuring consistency.<sup>40</sup> The researcher was non-medical, and health care professionals'  
13  
14 responses may have been different if the researcher had been a clinician.  
15  
16  
17

18  
19 The study's qualitative approach allowed an in-depth exploration of attitudes not possible in  
20  
21 quantitative surveys. Study participants were recruited from a single major city. Sixteen of  
22  
23 the 50 approached were interviewed. Conversely, and we are not able to comment on how  
24  
25 prevalent the views expressed in this study are in the wider population of primary health  
26  
27 care professionals or those from other healthcare systems. Also, what respondents  
28  
29 suggested they would do is not necessarily what they would actually do in reality.  
30  
31  
32

33  
34 Although the aim of qualitative research is not to be generalisable,<sup>41</sup> we did have a  
35  
36 representative sample of respondents across gender and ethnicity. Our sample size was  
37  
38 also sufficient to achieve saturation.<sup>42</sup>  
39  
40  
41

### 42 **Implications**

43  
44  
45 This study suggests despite potential acceptance of use of a polypill for secondary  
46  
47 prevention, health care professionals interviewed remained concerned that monitoring  
48  
49 should continue. With regard to primary prevention, there was considerable resistance to a  
50  
51 population strategy offering the polypill to everyone over a certain age. This reflected both  
52  
53 a concern about the lack of empirical evidence of the polypill's effectiveness and safety, and  
54  
55 a concern regarding medicalisation. If a polypill is to be used in this way, based on our  
56  
57  
58  
59  
60



1  
2  
3 | respondents views it is likely health care professionals would need to be convinced about  
4  
5  
6 the potential benefits of a drug based population approach to prevention.  
7  
8  
9  
10  
11  
12  
13  
14  
15  
16  
17  
18  
19  
20  
21  
22  
23  
24  
25  
26  
27  
28  
29  
30  
31  
32  
33  
34  
35  
36  
37  
38  
39  
40  
41  
42  
43  
44  
45  
46  
47  
48  
49  
50  
51  
52  
53  
54  
55  
56  
57  
58  
59  
60

For peer review only

1  
2  
3  
4  
5  
6  
7  
8  
9  
10  
11  
12  
13  
14  
15  
16  
17  
18  
19  
20  
21  
22  
23  
24  
25  
26  
27  
28  
29  
30  
31  
32  
33  
34  
35  
36  
37  
38  
39  
40  
41  
42  
43  
44  
45  
46  
47  
48  
49

| Profession<br>(primary<br>care<br>physician<br>(PCP)<br>/practice<br>nurse (PN)) | Practice<br>number | Gender |        | Ethnicity        |       | Year-of-professional-qualification |                   |                   |                   |                   | BMQ-General-score |                   |                 | Practice-size                                                       |                                                                      |                                                                    | Indices-of<br>Multiple<br>Deprivation<br>(Quartiles) |   |   |   |
|----------------------------------------------------------------------------------|--------------------|--------|--------|------------------|-------|------------------------------------|-------------------|-------------------|-------------------|-------------------|-------------------|-------------------|-----------------|---------------------------------------------------------------------|----------------------------------------------------------------------|--------------------------------------------------------------------|------------------------------------------------------|---|---|---|
|                                                                                  |                    | Male   | Female | White<br>British | Other | 1960<br>-<br>1969                  | 1970<br>-<br>1979 | 1980<br>-<br>1989 | 1990<br>-<br>1999 | 2000<br>-<br>2009 | Low<br>(8-15)     | Medium<br>(16-22) | High<br>(23-34) | Small<br>(1-2 full-time<br>equivalent<br>primary-care<br>physician) | Medium<br>(3-4 full-time<br>equivalent<br>primary-care<br>physician) | Large<br>(5≥ full-time<br>equivalent<br>primary-care<br>physician) | 1                                                    | 2 | 3 | 4 |
| PCP-1                                                                            | 1                  | ✓      |        | ✓                |       |                                    | ✓                 |                   |                   |                   |                   | ✓                 |                 | ✓                                                                   |                                                                      |                                                                    |                                                      |   |   | ✓ |
| PCP-2                                                                            | 2                  |        | ✓      | ✓                |       |                                    |                   | ✓                 |                   |                   |                   | ✓                 |                 |                                                                     | ✓                                                                    |                                                                    |                                                      | ✓ |   |   |
| PCP-3                                                                            | 2                  | ✓      |        | ✓                |       |                                    |                   | ✓                 |                   |                   |                   | ✓                 |                 |                                                                     | ✓                                                                    |                                                                    |                                                      | ✓ |   |   |
| PCP-4                                                                            | 4                  | ✓      |        |                  | ✓     |                                    |                   | ✓                 |                   |                   |                   | ✓                 |                 |                                                                     | ✓                                                                    |                                                                    |                                                      |   |   | ✓ |
| PCP-5                                                                            | 5                  | ✓      |        |                  | ✓     |                                    |                   |                   |                   | ✓                 |                   |                   | ✓               |                                                                     |                                                                      |                                                                    |                                                      |   |   | ✓ |
| PCP-6                                                                            | 7                  | ✓      |        |                  | ✓     |                                    |                   |                   |                   | ✓                 |                   |                   | ✓               |                                                                     |                                                                      |                                                                    |                                                      |   |   | ✓ |
| PCP-7                                                                            | 7                  |        | ✓      |                  | ✓     | ✓                                  |                   |                   |                   |                   |                   |                   | ✓               |                                                                     | ✓                                                                    |                                                                    |                                                      |   |   | ✓ |
| PCP-8                                                                            | 8                  | ✓      |        | ✓                |       |                                    |                   | ✓                 |                   |                   |                   |                   | ✓               |                                                                     |                                                                      | ✓                                                                  |                                                      |   |   | ✓ |
| PCP-9                                                                            | 8                  | ✓      |        |                  | ✓     |                                    |                   | ✓                 |                   |                   |                   |                   | ✓               |                                                                     |                                                                      | ✓                                                                  |                                                      |   |   | ✓ |
| PCP-10                                                                           | 9                  | ✓      |        |                  | ✓     |                                    |                   | ✓                 |                   |                   |                   |                   | ✓               |                                                                     |                                                                      |                                                                    |                                                      |   |   | ✓ |
| PCP-11                                                                           | 3                  | ✓      |        |                  | ✓     |                                    |                   | ✓                 |                   |                   |                   |                   | ✓               |                                                                     |                                                                      | ✓                                                                  |                                                      |   | ✓ |   |
| PN-1                                                                             | 1                  |        | ✓      | ✓                |       |                                    |                   | ✓                 |                   |                   |                   |                   | ✓               | ✓                                                                   |                                                                      |                                                                    |                                                      |   |   | ✓ |
| PN-2                                                                             | 3                  |        | ✓      | ✓                |       |                                    |                   | ✓                 |                   |                   |                   | ✓                 |                 |                                                                     |                                                                      | ✓                                                                  |                                                      |   | ✓ |   |
| PN-3                                                                             | 6                  |        | ✓      | ✓                |       |                                    |                   | ✓                 |                   |                   |                   | ✓                 |                 |                                                                     |                                                                      | ✓                                                                  |                                                      |   |   | ✓ |
| PN-4                                                                             | 7                  |        | ✓      | ✓                |       |                                    |                   | ✓                 |                   |                   |                   | ✓                 |                 | ✓                                                                   |                                                                      |                                                                    |                                                      |   |   | ✓ |
| PN-5                                                                             | 8                  |        | ✓      | ✓                |       |                                    |                   | ✓                 |                   |                   |                   | ✓                 |                 |                                                                     | ✓                                                                    |                                                                    |                                                      |   |   | ✓ |

1  
2  
3  
4  
5  
6  
7  
8  
9  
10  
11  
12  
13  
14  
15  
16  
17  
18  
19  
20  
21  
22  
23  
24  
25  
26  
27  
28  
29  
30  
31  
32  
33  
34  
35  
36  
37  
38  
39  
40  
41  
42  
43  
44  
45  
46  
47  
48  
49

| Profession | Gender         |      | Ethnicity |               | Year of professional qualification |           |           |           |           | Prescribing rights |             | BMQ-General score |            |                | Practice size |                                                         |                                                          | Indices of Multiple Deprivation (Quartiles)            |   |   |   |   |
|------------|----------------|------|-----------|---------------|------------------------------------|-----------|-----------|-----------|-----------|--------------------|-------------|-------------------|------------|----------------|---------------|---------------------------------------------------------|----------------------------------------------------------|--------------------------------------------------------|---|---|---|---|
|            | Practice Nurse | Male | Female    | White British | Other                              | 1960-1969 | 1970-1979 | 1980-1989 | 1990-1999 | 2000-2009          | Prescribers | Non-Prescribers   | Low (8-15) | Medium (16-22) | High (23-34)  | Small (1-2 full-time equivalent primary care physician) | Medium (3-4 full-time equivalent primary care physician) | Large (5≥ full-time equivalent primary care physician) | 1 | 2 | 3 | 4 |
| Physician  | 5              | 9    | 7         | 9             | 7                                  | 1         | 7         | 6         | 0         | 2                  | 11          | 5                 | 4          | 8              | 4             | 7                                                       | 6                                                        | 3                                                      | 2 | 2 | 7 | 5 |

Table 1: Health care professional characteristics

**Knowledge and understanding of the polypill**

*Would be used for cardiovascular disease prevention*

"[The polypill is]...hoping to reduce heart attacks and heart disease and stroke and things like that really...regardless of whether or not they have hypertension or ischemic heart disease at the time." (Primary care physician 4)

*Uncertainty over aspects of polypill*

"...you're only going to put these people on primary prevention if they're at risk, aren't you? It's not for everybody is it?" (Primary care physician 10)

*Knowledge based on journals and media*

"...I don't know what the thinking behind the use of it is other than what I've read in the national press." (Primary care physician 8)

**Use of the polypill for primary prevention**

*Concerns regarding actual polypill*

"...one would intellectually feel that if you put five pills in a pill, or four pills in a pill, more people are gonna react to it than if you've got one pill." (Primary care physician 3)

"I think you need titration, individual titration of different medications for individual people...so I can't imagine that one pill will work for everybody." (Practice nurse 3)

*Unnecessary medicalisation*

"...its [the polypill] just another medication that you'd be committing the person to really...I just think it's unnecessary. I think we should be teaching people, well people, how to keep themselves well without offering them preventive things, in the way of medication that is." (Practice nurse 1)

*Lack of evidence demonstrating effectiveness*

1  
2  
3 "...if you've got evidence that it works, then it would be easy for me to support. No, the evidence doesn't exist."  
4

5 (Primary care physician 8)  
6

7  
8 *Negative impact on patient lifestyle*  
9

10 "...it may very well give people a false sense of security...they'll continue to eat and drink too much, and smoke too much  
11 and take the polypill...it may make no difference whatsoever to them." (Primary care physician 4)  
12

13  
14  
15 *May reduce cardiovascular disease risk*  
16

17  
18 "...the possibilities are that it might reduce a populations' risk of heart disease and stroke." (Primary care physician 11)  
19

20  
21 "You would reach a population that you wouldn't otherwise reach, then you're broadening the service you're providing  
22 and reducing cardiovascular risk." (Primary care physician 8)  
23

24  
25 *Should only be for those with risk factors*  
26

27  
28 "It [the polypill] should only be for those at risk of a cardiovascular attack...especially if there's any history of  
29 cardiovascular disease in the family." (Primary care physician 2)  
30  
31

32  
33  
34  
35  
36 ***Use of the polypill for secondary prevention***  
37

38 *Practical for patients*  
39

40  
41 "...it just saves taking lots of tablets often: I think compliance probably would be better." (Practice nurse 5)  
42

43  
44 *Lack of purpose*  
45

46  
47 "...secondary prevention: I'm not so sure about because we are supposed to be treating these patients anyway...so there  
48 is a question really about...well the purpose really." (Primary care physician 11)  
49  
50  
51

52  
53  
54 Table 2: Attitude towards the Polypill  
55  
56  
57  
58  
59  
60

**Regular monitoring of patients**

*To check it is safe and effective*

"...how will you know it's actually being effective in terms of reducing blood pressure if it's not monitored?" (Practice nurse 3)

"...you need to see the side-effects...by monitoring. You need to see whether they are developing anything else as well."  
(Primary care physician 7)

*To screen for and encourage compliance*

"...just to reassure [patients] that yes it is working, because I think some people might stop taking it and then not bother coming back, and then you've got problems with non-compliance again." (Practice nurse 5)

*Medications are normally monitored*

"...if someone's on a drug then historically they are monitored...not to monitor would be difficult." (Practice nurse 4)

*Polypill is only feasible with no monitoring*

"I think the polypill is only feasible if there is no monitoring associated with it...it's probably only feasible if the dose is considered safe enough not to be monitored." (Primary care physician 11)

**Minimal monitoring of patients**

*Cause for concern*

"That as a GP does not sit comfortably...if you're prescribing medication you have an ethical and a moral obligation to monitor this person." (Primary care physician 10)

"You don't give people medicines without seeing what it's going to do: that's pure negligent..." (Primary care physician 1)

*Need to see the evidence*

"So if the evidence was you don't have to monitor a polypill then I would say fine...but you've got to give me the evidence that that's an okay way to behave before I would consider that..." (Primary care physician 8)

*Would still monitor*

"...if the advice was saying not to monitor I'd still want to...for the patients sake and my sake." (Primary care physician 6)

Table 3: Monitoring patients taking the Polypill

**Personal factors**

"...it's not my ethos to medicate well people to prevent the normal ageing process..." (Primary care physician 8)

"I just don't believe that there's a pill for every ill...later in life you are probably going to develop some problems with your blood pressure and maybe your cholesterol levels won't stay the same...I think you really have to live with them, you can't expect to be taking a tablet for every little change that's happening in your body." (Practice nurse 1)

**Drug factors (cost, monitoring, titration)**

"...if it's researched based, it's shown to have fantastic results, it's cost effective...yes I would prescribe it." (Practice nurse 2)

"...I would be happy prescribing it if I could watch people carefully for a while and see how they feel about it." (Practice nurse 3)

"...unless there are different doses of combinations of polypills, just giving one to somebody might not necessarily be the right one for that person." (Primary care physician 10)

**External factors (evidence, guidance)**

"...I would be happy [to prescribe the polypill], provided I've got enough data to go on...I think everything hinges on that actually." (Primary care physician 7)

"If our PCT and the Department of Health feel it's a good thing, then yes I would prescribe it." (Practice nurse 2)

**Patient factors (risk level, patient choice, previous side-effects, existing cardiovascular disease, compliance, other medical conditions/medications, age)**

"...patients would have to be selected on the basis of their family history...if the family history contains ischaemic heart disease then they're the ones we should be picking first." (Primary care physician 4)

"I think we should give patients options. I don't think we should be saying "oh that is the one". It's very much a personal choice for the patient." (Primary care physician 5)

1  
2  
3 “Somebody who’s had an adverse reaction to any of those things that are in it [the polypill], I honestly wouldn’t  
4 prescribe it, just like you wouldn’t prescribe that drug to them.” (Primary care physician 2)  
5  
6  
7 “Secondary prevention patients – if we’re going to combine some of the medications that they’re already on into a  
8 polypill so they’re taking fewer tablets...they might be interested.” (Primary care physician 1)  
9  
10  
11 “...it very much depends on the type of patient...some people will probably just be happier to take one pill rather than a  
12 couple...people who have a problem with compliance...it would be the right one for them...” (Primary care physician 5)  
13  
14  
15 “...I don’t know if it is contraindicated with people with certain conditions or people who are on certain medications like  
16 warfarin for instance...that could be a barrier.” (Practice nurse 2)  
17  
18  
19 “If they haven’t got any risk factors for cardiovascular disease, I don’t think everybody over the age of 50 should be  
20 taking it. I don’t think I’ll agree to that.” (Primary care physician 5)  
21  
22  
23 “...[the polypill] couldn’t just be handed out to everybody over the age of 50, unless the studies and research suggested  
24 that there were no adverse effects and anyone could take the drug...even if they didn’t have hypertension.” (Practice  
25 nurse 4)  
26  
27  
28  
29  
30  
31  
32  
33  
34  
35  
36  
37  
38  
39  
40  
41  
42  
43  
44  
45  
46  
47  
48  
49  
50  
51  
52  
53  
54  
55  
56  
57  
58  
59  
60

Table 4: Prescribing the Polypill



## References

1. Mathers CD, Boerma T, Ma Fat D. Global and regional causes of death. *Br Med Bull*. 2009;92:7-32.
2. Psaty BM, Lumley T, Furberg CD, et al. Health outcomes associated with various antihypertensive therapies used as first-line agents: a network meta-analysis. *JAMA*. May 21 2003;289(19):2534-2544.
3. PROGRESS Collaborative Group. Randomised trial of a perindopril-based blood-pressure-lowering regimen among 6,105 individuals with previous stroke or transient ischaemic attack. *Lancet*. Sep 29 2001;358(9287):1033-1041.
4. Law MR, Wald NJ, Rudnicka AR. Quantifying effect of statins on low density lipoprotein cholesterol, ischaemic heart disease, and stroke: systematic review and meta-analysis. *BMJ*. Jun 28 2003;326(7404):1423.
5. National Institute for Health and Clinical Excellence. Hypertension: clinical management of primary hypertension in adults. CG1272011.
6. National Institute for Health and Clinical Excellence. Lipid modification: cardiovascular risk assessment and the modification of blood lipids for the primary and secondary prevention of cardiovascular disease. CG762008.
7. Sproston K, Primatesta P. *Health Survey for England 20032004*.
8. Seddon ME, Marshall MN, Campbell SM, Roland MO. Systematic review of studies of quality of clinical care in general practice in the UK, Australia and New Zealand. *Qual Health Care*. Sep 2001;10(3):152-158.
9. Yusuf S, Islam S, Chow CK, et al. Use of secondary prevention drugs for cardiovascular disease in the community in high-income, middle-income, and low-income countries (the PURE Study): a prospective epidemiological survey. *Lancet*. 2011;378(9798):1231-1243.
10. Wald DS, Wald NJ. The polypill in the primary prevention of cardiovascular disease. *Fundam Clin Pharmacol*. Feb 2010;24(1):29-35.
11. Wald NJ, Law MR. A strategy to reduce cardiovascular disease by more than 80%. *BMJ*. Jun 28 2003;326(7404):1419.
12. Law MR, Morris JK, Wald NJ. Use of blood pressure lowering drugs in the prevention of cardiovascular disease: meta-analysis of 147 randomised trials in the context of expectations from prospective epidemiological studies. *BMJ (Clinical research ed)*. 2009;338:b1665.
13. Cholesterol Treatment Trialists C, Mihaylova B, Emberson J, et al. The effects of lowering LDL cholesterol with statin therapy in people at low risk of vascular disease: meta-analysis of individual data from 27 randomised trials. *Lancet*. 2012;380(9841):581-590.
14. Elley CR, Gupta AK, Webster R, et al. The efficacy and tolerability of 'polypills': meta-analysis of randomised controlled trials. *PLoS One*. 2012;7(12):e52145.
15. Gupta AK, Arshad S, Poulter NR. Compliance, safety, and effectiveness of fixed-dose combinations of antihypertensive agents: a meta-analysis. *Hypertension*. Feb 2010;55(2):399-407.
16. Bangalore S, Kamalakkannan G, Parkar S, Messerli FH. Fixed-dose combinations improve medication compliance: a meta-analysis. *Am J Med*. Aug 2007;120(8):713-719.
17. Holt S. New Zealand general practitioners' opinions of the polypill concept. *N Z Med J*. May 8 2009;122(1294):116-117.
18. Soliman EZ, Mendis S, Dissanayake WP, et al. A Polypill for primary prevention of cardiovascular disease: a feasibility study of the World Health Organization. *Trials*. 2011;12:3.
19. Viera AJ, Sheridan SL, Edwards T, Soliman EZ, Harris R, Furberg CD. Acceptance of a Polypill approach to prevent cardiovascular disease among a sample of U.S. physicians. *Prev Med*. Jan 2011;52(1):10-15.

- 1
  - 2
  - 3
  - 4
  - 5
  - 6
  - 7
  - 8
  - 9
  - 10
  - 11
  - 12
  - 13
  - 14
  - 15
  - 16
  - 17
  - 18
  - 19
  - 20
  - 21
  - 22
  - 23
  - 24
  - 25
  - 26
  - 27
  - 28
  - 29
  - 30
  - 31
  - 32
  - 33
  - 34
  - 35
  - 36
  - 37
  - 38
  - 39
  - 40
  - 41
  - 42
  - 43
  - 44
  - 45
  - 46
  - 47
  - 48
  - 49
  - 50
  - 51
  - 52
  - 53
  - 54
  - 55
  - 56
  - 57
  - 58
  - 59
  - 60
20. Neergaard MA, Olesen F, Andersen RS, Sondergaard J. Qualitative description - the poor cousin of health research? *BMC Med Res Methodol*. 2009;9:52.
21. Sandelowski M. What's in a name? Qualitative description revisited. *Res Nurs Health*. Feb 2010;33(1):77-84.
22. Patton MQ. *Qualitative research and evaluation methods*. 3rd ed. ed. London: SAGE; 2002.
23. Strickland-Hodge B, Jepson MH. Identification and characterization of early and late prescribers in general practice. *J R Soc Med*. May 1982;75(5):341-345.
24. Hemingway H, Shipley M, Macfarlane P, Marmot M. Impact of socioeconomic status on coronary mortality in people with symptoms, electrocardiographic abnormalities, both or neither: the original Whitehall study 25 year follow up. *J Epidemiol Commun H*. 2000;54(7):510-516.
25. Noble M, Wright G, Dibben C, et al. The English Indices of Deprivation 2004 (revised). Report to the Office of the Deputy Prime Minister: London: Neighbourhood Renewal Unit, 2004.
26. Office for National Statistics. 2001 Census [Key Statistics for Local Authorities]. *Census Area Statistics*: Crown Copyright 2003. HMSO.
27. Office for National Statistics. Census 2001: Definitions: Crown Copyright 2004. HMSO.
28. Horne R, Weinman J, Hankins M. The beliefs about medicines questionnaire: The development and evaluation of a new method for assessing the cognitive representation of medication. *Psychol Health*. 1999;14(1):1-24.
29. Horne R, Weinman J. Patients' beliefs about prescribed medicines and their role in adherence to treatment in chronic physical illness. *J Psychosom Res*. Dec 1999;47(6):555-567.
30. Mardby AC, Akerlind I, Hedenrud T. General beliefs about medicines among doctors and nurses in out-patient care: a cross-sectional study. *BMC Fam Pract*. 2009;10:35.
31. Kumar K, Gordon C, Toescu V, et al. Beliefs about medicines in patients with rheumatoid arthritis and systemic lupus erythematosus: a comparison between patients of South Asian and White British origin. *Rheumatology (Oxford)*. May 2008;47(5):690-697.
32. Ritchie J, Lewis J. *Qualitative research practice : a guide for social science students and researchers*. London: Sage Publications; 2003.
33. Pope C, Mays N. Reaching the parts other methods cannot reach: an introduction to qualitative methods in health and health services research. *BMJ*. Jul 1 1995;311(6996):42-45.
34. Carlson JA. Avoiding Traps in Member Checking. *The Qualitative Report*. 2010;15:1102-1113.
35. Glaser BG. The Constant Comparative Method of Qualitative-Analysis. *Soc Probl*. 1965;12(4):436-445.
36. National Centre for Social Research. Framework: New dimensions in qualitative research (software), Version 1.1. 2009.
37. Stevenson FA, Barry CA, Britten N, Barber N, Bradley CP. Doctor-patient communication about drugs: the evidence for shared decision making. *Soc Sci Med*. Mar 2000;50(6):829-840.
38. Mason A. New medicines in primary care: a review of influences on general practitioner prescribing. *J Clin Pharm Ther*. Feb 2008;33(1):1-10.
39. Jacoby A, Smith M, Eccles M. A qualitative study to explore influences on general practitioners' decisions to prescribe new drugs. *Br J Gen Pract*. Feb 2003;53(487):120-125.
40. Matteson SM, Lincoln YS. Using Multiple Interviewers in Qualitative Research Studies The Influence of Ethic of Care Behaviors in Research Interview Settings. *Qual Inq*. Apr 2009;15(4):659-674.
41. Polit DF, Beck CT. Generalization in quantitative and qualitative research: myths and strategies. *Int J Nurs Stud*. Nov 2010;47(11):1451-1458.
42. Guest G, Bunce A, Johnson L. How many interviews are enough? An experiment with data saturation and variability. *Field methods*. Feb 2006;18(1):59-82.
